# Supplementary material
Source: PubMed Central journal article supplement (PMC1482507)
Supplement: pnas_0600246103_5.pdf [file pnas_0600246103_5.pdf]

Table 1 Genes with expression altered by  $\geq$ 2.5 fold ( $p \leq 0.05$ ) in HNF4 $\alpha$  null embryonic livers**GENES DOWNREGULATED  $\geq 2.5$  FOLD ( $p \leq 0.05$ ) in HNF4 $\alpha$  NULL EMBRYONIC LIVERS**

| GENE                                                          | GENE SYMBOL   | GENE ONTOLOGY BIOLOGICAL PROCESS | GENE ID | FOLD CHANGE | P VALUE  |
|---------------------------------------------------------------|---------------|----------------------------------|---------|-------------|----------|
| 4-hydroxyphenylpyruvic acid dioxygenase                       | Hpd           | amino acid metabolism            | 15445   | -29.23      | 0.001108 |
| amidohydrolase domain containing 1                            | Amdhd1        | amino acid metabolism            | 71761   | -39.82      | 0.007207 |
| aminoadipate-semialdehyde synthase                            | Aass          | amino acid metabolism            | 30956   | -7.52       | 0.003453 |
| arginase 1, liver                                             | Arg1          | amino acid metabolism            | 11846   | -3.23       | 0.003236 |
| argininosuccinate lyase                                       | Asl           | amino acid metabolism            | 109900  | -7.46       | 0.000187 |
| argininosuccinate synthetase 1                                | Ass1          | amino acid metabolism            | 11898   | -4.33       | 0.015563 |
| betaine-homocysteine methyltransferase                        | Bhmt          | amino acid metabolism            | 12116   | -17.46      | 0        |
| betaine-homocysteine methyltransferase 2                      | Bhmt2         | amino acid metabolism            | 64918   | -12.19      | 0.000429 |
| branched chain ketoacid dehydrogenase E1, beta polypeptide    | Bckdhb        | amino acid metabolism            | 12040   | -2.69       | 0.006287 |
| cystathionase (cystathionine gamma-lyase)                     | Cth           | amino acid metabolism            | 107869  | -6.85       | 0.011846 |
| cysteine conjugate-beta lyase                                 | Ccbl1         | amino acid metabolism            | 70266   | -6.29       | 0.008984 |
| cysteine dioxygenase 1, cytosolic                             | Cdo1          | amino acid metabolism            | 12583   | -8.45       | 0.000371 |
| cysteine sulfinic acid decarboxylase                          | Csad          | amino acid metabolism            | 246277  | -3.32       | 0.004894 |
| dimethylglycine dehydrogenase precursor                       | Dmgdh         | amino acid metabolism            | 74129   | -8.9        | 0.000059 |
| formiminotransferase cyclodeaminase                           | Ftcd          | amino acid metabolism            | 14317   | -31.2       | 0.001548 |
| fumarylacetoacetate hydrolase                                 | Fah           | amino acid metabolism            | 14085   | -13.59      | 0.003263 |
| glutamate oxaloacetate transaminase 1, soluble                | Got1          | amino acid metabolism            | 14718   | -2.73       | 0.000706 |
| glutamate oxaloacetate transaminase 2, mitochondrial          | Got2          | amino acid metabolism            | 14719   | -2.77       | 0.000574 |
| glutamate-ammonia ligase (glutamine synthase)                 | Glul          | amino acid metabolism            | 14645   | -2.52       | 0.014339 |
| glutaminase 2 (liver, mitochondrial)                          | Gls2          | amino acid metabolism            | 216456  | -4.89       | 0.001456 |
| glutathione transferase zeta 1 (maleylacetoacetate isomerase) | Gstz1         | amino acid metabolism            | 14874   | -3.46       | 0.000285 |
| glycine decarboxylase                                         | Gldc          | amino acid metabolism            | 104174  | -25.02      | 0.000172 |
| histidine ammonia lyase                                       | Hal           | amino acid metabolism            | 15109   | -14.6       | 0.001689 |
| homogentisate 1, 2-dioxygenase                                | Hgd           | amino acid metabolism            | 15233   | -7.9        | 0.000178 |
| kynureninase (L-kynurenine hydrolase)                         | Kynu          | amino acid metabolism            | 70789   | -4.35       | 0.007292 |
| lysosomal membrane glycoprotein 2                             | Lamp2         | amino acid metabolism            | 16784   | -2.67       | 0.001169 |
| methionine adenosyltransferase 1, alpha                       | Mat1a         | amino acid metabolism            | 11720   | -7.93       | 0.000121 |
| ornithine transcarbamylase                                    | Otc           | amino acid metabolism            | 18416   | -1055.36    | 0.007811 |
| proline dehydrogenase (oxidase) 2                             | Prodh2        | amino acid metabolism            | 56189   | -7.19       | 0.005565 |
| RIKEN cDNA 0610012D14 gene                                    | 0610012D14Rik | amino acid metabolism            | 68352   | -27.24      | 0.002423 |
| sarcosine dehydrogenase                                       | Sardh         | amino acid metabolism            | 192166  | -4.49       | 0.000868 |
| serine hydroxymethyl transferase 1 (soluble)                  | Shmt1         | amino acid metabolism            | 20425   | -3.58       | 0.00462  |
| tyrosine aminotransferase                                     | Tat           | amino acid metabolism            | 234724  | -4.18       | 0.015757 |
| urocanase domain containing 1                                 | Uroc1         | amino acid metabolism            | 243537  | -26.86      | 0.003172 |

| GENE                                                       | GENE SYMBOL | GENE ONTOLOGY BIOLOGICAL PROCESS | GENE ID | FOLD CHANGE | P VALUE  |
|------------------------------------------------------------|-------------|----------------------------------|---------|-------------|----------|
| 6-phosphofructo-2-kinase/fructose-2,6-biphosphatase 1      | Pfkfb1      | carbohydrate metabolism          | 18639   | -3.21       | 0.00056  |
| aldolase 2, B isoform                                      | Aldob       | carbohydrate metabolism          | 230163  | -145.42     | 0.000114 |
| dicarbonyl L-xylulose reductase                            | Dcxr        | carbohydrate metabolism          | 67880   | -3.53       | 0.004723 |
| fructose biphosphatase 1                                   | Fbp1        | carbohydrate metabolism          | 14121   | -18.64      | 0.003536 |
| galactokinase 1                                            | Galk1       | carbohydrate metabolism          | 14635   | -5.02       | 0.000132 |
| galactose mutarotase                                       | Galm        | carbohydrate metabolism          | 319625  | -2.86       | 0.008453 |
| glucokinase regulatory protein                             | Gckr        | carbohydrate metabolism          | 231103  | -5.19       | 0.000719 |
| glucose-6-phosphatase, catalytic                           | G6pc        | carbohydrate metabolism          | 14377   | -16.33      | 0.016574 |
| glycerol kinase                                            | Gyk         | carbohydrate metabolism          | 14933   | -6.78       | 0.031386 |
| glycerol-3-phosphate dehydrogenase 1 (soluble)             | Gpd1        | carbohydrate metabolism          | 14555   | -28.98      | 0.000351 |
| glycogen synthase 2                                        | Gys2        | carbohydrate metabolism          | 232493  | -11.43      | 0.000226 |
| hexose-6-phosphate dehydrogenase (glucose 1-dehydrogenase) | H6pd        | carbohydrate metabolism          | 100198  | -4.18       | 0.005553 |
| liver glycogen phosphorylase                               | Pygl        | carbohydrate metabolism          | 110095  | -2.99       | 0.000503 |
| maltase-glucoamylase                                       | Mgam        | carbohydrate metabolism          | 232714  | -6.1        | 0.00039  |
| protein phosphatase 1, regulatory (inhibitor) subunit 3B   | Ppp1r3b     | carbohydrate metabolism          | 244416  | -3.88       | 0.024111 |
| protein phosphatase 1, regulatory (inhibitor) subunit 3C   | Ppp1r3c     | carbohydrate metabolism          | 53412   | -2.6        | 0.046223 |
| pyruvate carboxylase                                       | Pcx         | carbohydrate metabolism          | 18563   | -9.16       | 0.000909 |
| pyruvate dehydrogenase kinase, isoenzyme 4                 | Pdk4        | carbohydrate metabolism          | 27273   | -2.68       | 0.008193 |
| succinate-CoA ligase, GDP-forming, alpha subunit           | Suclg1      | carbohydrate metabolism          | 56451   | -2.51       | 0.004354 |
| UDP-glucose pyrophosphorylase 2                            | Ugp2        | carbohydrate metabolism          | 216558  | -2.81       | 0.007562 |
| xylulokinase homolog                                       | Xylb        | carbohydrate metabolism          | 102448  | -17.35      | 0.016977 |
| cadherin 1                                                 | Cdh1        | cell adhesion                    | 12550   | -17.73      | 0.004391 |
| CEA-related cell adhesion molecule 1                       | Ceacam1     | cell adhesion                    | 26365   | -5.05       | 0.010441 |
| CEA-related cell adhesion molecule 2                       | Ceacam2     | cell adhesion                    | 26367   | -4.99       | 0.000645 |
| claudin 1                                                  | Cldn1       | cell adhesion                    | 12737   | -24.41      | 0.001018 |
| coxsackievirus and adenovirus receptor                     | Cxadr       | cell adhesion                    | 13052   | -3.42       | 0.017047 |
| crumbs homolog 3 (Drosophila)                              | Crb3        | cell adhesion                    | 224912  | -10.08      | 0.012988 |
| desmocollin 2                                              | Dsc2        | cell adhesion                    | 13506   | -55.3       | 0.005931 |
| epiplakin 1                                                | Eppk1       | cell adhesion                    | 223650  | -3.94       | 0.0327   |
| epithelial V-like antigen 1                                | Eva1        | cell adhesion                    | 14012   | -6.24       | 0.000276 |
| F11 receptor                                               | F11r        | cell adhesion                    | 16456   | -2.58       | 0.006942 |
| gap junction membrane channel protein beta 1               | Gjb1        | cell adhesion                    | 14618   | -7.4        | 0.003246 |
| gelsolin                                                   | Gsn         | cell adhesion                    | 227753  | -8.8        | 0.002249 |
| glycosylphosphatidylinositol specific phospholipase D1     | Gpld1       | cell adhesion                    | 14756   | -8.9        | 0.000075 |
| lectin, galactose binding, soluble 9                       | Lgals9      | cell adhesion                    | 16859   | -2.91       | 0.004381 |
| mannose binding lectin, serum (C)                          | Mbl2        | cell adhesion                    | 17195   | -52.32      | 0.035122 |
| nephronectin                                               | Npnt        | cell adhesion                    | 114249  | -3.98       | 0.00802  |
| occludin                                                   | Ocln        | cell adhesion                    | 18260   | -4.86       | 0.000244 |
| plakophilin 2                                              | Pkp2        | cell adhesion                    | 67451   | -4.59       | 0.000413 |
| rhophilin, Rho GTPase binding protein 2                    | Rhpn2       | cell adhesion                    | 52428   | -2.64       | 0.007374 |

| GENE                                                                                | GENE SYMBOL | GENE ONTOLOGY BIOLOGICAL<br>PROCESS | GENE ID | FOLD CHANGE | P VALUE  |
|-------------------------------------------------------------------------------------|-------------|-------------------------------------|---------|-------------|----------|
| syndecan 1                                                                          | Sdc1        | cell adhesion                       | 20969   | -2.63       | 0.006026 |
| T-cell immunoglobulin and mucin domain<br>containing 2                              | Timd2       | cell adhesion                       | 171284  | -22.49      | 0.006035 |
| vitronectin                                                                         | Vtn         | cell adhesion                       | 22370   | -2.86       | 0.002887 |
| clusterin                                                                           | Clu         | cell death                          | 12759   | -3.09       | 0.019155 |
| angiopoietin-like 4                                                                 | Angptl4     | cell death                          | 57875   | -4.73       | 0.000839 |
| cell death-inducing DNA fragmentation factor,<br>alpha subunit-like effector B12684 | Cideb       | cell death                          | 12684   | -9.68       | 0.000063 |
| serine incorporator 3                                                               | Serinc3     | cell death                          | 26943   | -4.96       | 0.001471 |
| thrombopoietin                                                                      | Thpo        | cell proliferation                  | 21832   | -2.59       | 0.024386 |
| leukocyte cell-derived chemotaxin 2                                                 | Lect2       | chemotaxis                          | 16841   | -2.52       | 0.000234 |
| apolipoprotein H                                                                    | Apoh        | coagulation                         | 11818   | -2.5        | 0.00106  |
| coagulation factor II                                                               | F2          | coagulation                         | 14061   | -2.89       | 0.000121 |
| coagulation factor IX                                                               | F9          | coagulation                         | 14071   | -22.75      | 0.00205  |
| coagulation factor V                                                                | F5          | coagulation                         | 14067   | -8.07       | 0.004506 |
| coagulation factor VII                                                              | F7          | coagulation                         | 14068   | -6.51       | 0.006378 |
| coagulation factor X                                                                | F10         | coagulation                         | 14058   | -43.85      | 0.000786 |
| coagulation factor XI                                                               | F11         | coagulation                         | 109821  | -2.75       | 0.003407 |
| coagulation factor XII (Hageman factor)                                             | F12         | coagulation                         | 58992   | -1198.94    | 0.000589 |
| coagulation factor XIII, beta subunit                                               | F13b        | coagulation                         | 14060   | -230.01     | 0.000574 |
| kininogen 1                                                                         | Kng1        | coagulation                         | 16644   | -10.33      | 0.000148 |
| macrophage stimulating 1 (hepatocyte growth<br>factor-like)                         | Mst1        | coagulation                         | 15235   | -3.84       | 0.000235 |
| protein C                                                                           | Proc        | coagulation                         | 19123   | -3.03       | 0.000342 |
| protein Z, vitamin K-dependent plasma<br>glycoprotein                               | Proz        | coagulation                         | 66901   | -405.03     | 0.0024   |
| serine (or cysteine) proteinase inhibitor, clade<br>C (antithrombin), member 1      | Serpinc1    | coagulation                         | 11905   | -7.11       | 0.000181 |
| tissue factor pathway inhibitor 2                                                   | Tfpi2       | coagulation                         | 21789   | -16.89      | 0.003257 |
| vitamin K epoxide reductase complex, subunit<br>1                                   | Vkorc1      | coagulation                         | 27973   | -3.12       | 0.000861 |
| myosin Vb                                                                           | Myo5b       | cytoskeletal organization           | 17919   | -4.14       | 0.001391 |
| Wiskott-Aldrich syndrome protein interacting<br>protein                             | Waspip      | cytoskeletal organization           | 215280  | -5.13       | 0.003413 |
| erythrocyte protein band 4.1-like 5                                                 | Epb4.115    | development                         | 226352  | -2.91       | 0.000352 |
| N-myc downstream regulated gene 2                                                   | Ndrp2       | development                         | 29811   | -4.93       | 0.021283 |
| acyl-Coenzyme A dehydrogenase family,<br>member 11                                  | Acad11      | electron transport                  | 102632  | -14.65      | 0.005618 |
| aldehyde oxidase 3                                                                  | Aox3        | electron transport                  | 71724   | -21.13      | 0.03362  |
| arachidonate 12-lipoxygenase                                                        | Alox12      | electron transport                  | 11684   | -2.51       | 0.031662 |
| cytochrome P450, family 2, subfamily b,<br>polypeptide 9                            | Cyp2b9      | electron transport                  | 13094   | -3.44       | 0.046149 |
| cytochrome P450, family 2, subfamily c,<br>polypeptide 40                           | Cyp2c40     | electron transport                  | 13099   | -2.64       | 0.002811 |
| cytochrome P450, family 2, subfamily c,<br>polypeptide 70                           | Cyp2c70     | electron transport                  | 226105  | -12.2       | 0.000042 |
| cytochrome p450, family 2, subfamily c, pp44                                        | Cyp2c44     | electron transport                  | 226143  | -11.94      | 0.021312 |

| GENE                                                   | GENE SYMBOL | GENE ONTOLOGY BIOLOGICAL PROCESS | GENE ID | FOLD CHANGE | P VALUE  |
|--------------------------------------------------------|-------------|----------------------------------|---------|-------------|----------|
| cytochrome P450, family 2, subfamily d, polypeptide 10 | Cyp2d10     | electron transport               | 13101   | -1023.6     | 0.000136 |
| cytochrome P450, family 2, subfamily d, polypeptide 26 | Cyp2d26     | electron transport               | 76279   | -3014.9     | 0.000197 |
| cytochrome P450, family 2, subfamily e, polypeptide 1  | Cyp2e1      | electron transport               | 13106   | -52.68      | 0.023257 |
| cytochrome P450, family 2, subfamily j, polypeptide 5  | Cyp2j5      | electron transport               | 13109   | -35.17      | 0.002812 |
| cytochrome P450, family 3, subfamily a, polypeptide 11 | Cyp3a11     | electron transport               | 13112   | -56.22      | 0.030333 |
| cytochrome P450, family 3, subfamily a, polypeptide 16 | Cyp3a16     | electron transport               | 13114   | -28.64      | 0.029809 |
| cytochrome P450, family 3, subfamily a, polypeptide 25 | Cyp3a25     | electron transport               | 56388   | -274.97     | 0.037079 |
| cytochrome P450, family 3, subfamily a, polypeptide 41 | Cyp3a41     | electron transport               | 53973   | -444.84     | 0.017532 |
| cytochrome P450, family 39, subfamily a, polypeptide 1 | Cyp39a1     | electron transport               | 56050   | -4.6        | 0.032146 |
| cytochrome P450, family 4, subfamily a, polypeptide 12 | Cyp4a12     | electron transport               | 277753  | -24.51      | 0.044568 |
| cytochrome P450, family 4, subfamily f, polypeptide 15 | Cyp4f15     | electron transport               | 106648  | -4          | 0.0351   |
| cytochrome P450, family 4, subfamily v, polypeptide 3  | Cyp4v3      | electron transport               | 102294  | -2.64       | 0.003125 |
| cytochrome P450, family 7, subfamily a, polypeptide 1  | Cyp7a1      | electron transport               | 13122   | -3.56       | 0.032412 |
| cytochrome P450, family 8, subfamily b, polypeptide 1  | Cyp8b1      | electron transport               | 13124   | -67.42      | 0.000566 |
| dihydropyrimidine dehydrogenase                        | Dpyd        | electron transport               | 99586   | -12.57      | 0.016779 |
| electron transferring flavoprotein, dehydrogenase      | Etfdh       | electron transport               | 66841   | -2.61       | 0.000427 |
| ferredoxin 1                                           | Fdx1        | electron transport               | 14148   | -3.22       | 0.000714 |
| flavin containing monooxygenase 1                      | Fmo1        | electron transport               | 14261   | -9.58       | 0.000028 |
| flavin containing monooxygenase 5                      | Fmo5        | electron transport               | 14263   | -13.15      | 0.008679 |
| glutaryl-Coenzyme A dehydrogenase                      | Gcdh        | electron transport               | 270076  | -2.63       | 0.00956  |
| gulonolactone (L-) oxidase                             | Gulo        | electron transport               | 268756  | -3.3        | 0.00957  |
| hydroxyacid oxidase (glycolate oxidase) 3              | Hao3        | electron transport               | 56185   | -29.12      | 0.002192 |
| hydroxyacid oxidase 1, liver                           | Hao1        | electron transport               | 15112   | -29.8       | 0.007848 |
| monoamine oxidase B                                    | Maob        | electron transport               | 109731  | -2.6        | 0.001342 |
| P450 (cytochrome) oxidoreductase                       | Por         | electron transport               | 18984   | -5.29       | 0.009756 |
| pipecolic acid oxidase                                 | Pipox       | electron transport               | 19193   | -6.4        | 0.000168 |
| quiescin Q6                                            | Qscn6       | electron transport               | 104009  | -3.95       | 0.001024 |
| asialoglycoprotein receptor 1                          | Asgr1       | endocytosis                      | 11889   | -682.84     | 0.002778 |
| asialoglycoprotein receptor 2                          | Asgr2       | endocytosis                      | 11890   | -24.23      | 0.017185 |
| alpha-2-glycoprotein 1, zinc                           | Azgp1       | immune response                  | 12007   | -17.96      | 0.011914 |
| CD1d1 antigen                                          | Cd1d1       | immune response                  | 12479   | -3.88       | 0.01432  |
| chemokine (C-C motif) ligand 9                         | Ccl9        | immune response                  | 20308   | -9.05       | 0.004004 |

| GENE                                                                                                                                                                                                                                                                | GENE SYMBOL                                       | GENE ONTOLOGY BIOLOGICAL PROCESS | GENE ID                                | FOLD CHANGE | P VALUE  |
|---------------------------------------------------------------------------------------------------------------------------------------------------------------------------------------------------------------------------------------------------------------------|---------------------------------------------------|----------------------------------|----------------------------------------|-------------|----------|
| complement component 1, r subcomponent                                                                                                                                                                                                                              | C1r                                               | immune response                  | 50909                                  | -5.46       | 0.008999 |
| complement component 2 (within H-2S)                                                                                                                                                                                                                                | C2                                                | immune response                  | 12263                                  | -5.55       | 0.001273 |
| complement component 4 (within H-2S)                                                                                                                                                                                                                                | C4                                                | immune response                  | 12268                                  | -14.36      | 0.004076 |
| complement component 8, alpha polypeptide                                                                                                                                                                                                                           | C8a                                               | immune response                  | 230558                                 | -50.17      |          |
| complement component 8, beta subunit                                                                                                                                                                                                                                | C8b                                               | immune response                  | 110382                                 | -6.62       | 0.013077 |
| complement component factor h                                                                                                                                                                                                                                       | Cfh                                               | immune response                  | 12628                                  | -21.42      | 0.004866 |
| complement component factor h-like 1                                                                                                                                                                                                                                | Cfh1                                              | immune response                  | 50702                                  | -168.63     | 0.005419 |
| complement component factor i                                                                                                                                                                                                                                       | Cfi                                               | immune response                  | 12630                                  | -13.49      | 0.000304 |
| C-reactive protein, petaxin related                                                                                                                                                                                                                                 | Crp                                               | immune response                  | 12944                                  | -4.2        | 0.001386 |
| defensin beta 1                                                                                                                                                                                                                                                     | Defb1                                             | immune response                  | 13214                                  | -81.46      | 0.031347 |
| haptoglobin                                                                                                                                                                                                                                                         | Hp                                                | immune response                  | 15439                                  | -8.49       | 0.002222 |
| hemolytic complement                                                                                                                                                                                                                                                | Hc                                                | immune response                  | 15139                                  | -10.95      | 0.013873 |
| histocompatibility 2, complement component factor B                                                                                                                                                                                                                 | H2-Bf                                             | immune response                  | 14962                                  | -28.11      | 0.000219 |
| histocompatibility 2, Q region locus 10                                                                                                                                                                                                                             | H2-Q10                                            | immune response                  | 15007                                  | -21.52      | 0.008922 |
| interleukin 1 receptor antagonist                                                                                                                                                                                                                                   | Il1rn                                             | immune response                  | 16181                                  | -4.67       | 0.024091 |
| lipopolysaccharide binding protein                                                                                                                                                                                                                                  | Lbp                                               | immune response                  | 16803                                  | -2.64       | 0.003103 |
| liver-expressed antimicrobial peptide 2                                                                                                                                                                                                                             | Leap2                                             | immune response                  | 259301                                 | -18.72      | 0.001578 |
| macrophage activation 2 like                                                                                                                                                                                                                                        | Mpa2l                                             | immune response                  | 100702                                 | -7.1        | 0.007472 |
| mannan-binding lectin serine protease 1                                                                                                                                                                                                                             | Masp1                                             | immune response                  | 17174                                  | -7.65       | 0.004163 |
| peptidoglycan recognition protein 2                                                                                                                                                                                                                                 | Pglyrp2                                           | immune response                  | 57757                                  | -258.57     | 0.012178 |
| retinoic acid receptor responder (tazarotene induced) 2                                                                                                                                                                                                             | Rarres2                                           | immune response                  | 71660                                  | -5.27       | 0.020174 |
| serine (or cysteine) proteinase inhibitor, clade A, member 1a                                                                                                                                                                                                       | Serpina1a                                         | immune response                  | 20700                                  | -6.99       | 0.00008  |
| serine (or cysteine) proteinase inhibitor, clade A, member 1b                                                                                                                                                                                                       | Serpina1b                                         | immune response                  | 20701                                  | -3.9        | 0.000154 |
| serine (or cysteine) proteinase inhibitor, clade A, member 1b /// serine (or cysteine) proteinase inhibitor, clade A, member 1d /// serine (or cysteine) proteinase inhibitor, clade A, member 1a /// serine (or cysteine) proteinase inhibitor, clade A, member 1e | Serpina1a///Serpina1b//<br>/Serpina1d///Serpina1e | immune response                  | 20700 /// 20701 ///<br>20703 /// 20704 | -6.43       | 0.010918 |
| serine (or cysteine) proteinase inhibitor, clade A, member 3N                                                                                                                                                                                                       | Serpina3n                                         | immune response                  | 20716                                  | -35.79      | 0.000457 |
| serine (or cysteine) proteinase inhibitor, clade G, member 1                                                                                                                                                                                                        | Serping1                                          | immune response                  | 12258                                  | -2.97       | 0.000061 |
| serum amyloid A 4                                                                                                                                                                                                                                                   | Saa4                                              | immune response                  | 20211                                  | -6.33       | 0.00665  |
| serum amyloid P-component                                                                                                                                                                                                                                           | Apcs                                              | immune response                  | 20219                                  | -14.35      | 0.004519 |
| T-cell receptor gamma, variable 4                                                                                                                                                                                                                                   | Tcrg-V4                                           | immune response                  | 21638                                  | -3.22       | 0.004577 |
| T-cell specific GTPase                                                                                                                                                                                                                                              | Tgtp                                              | immune response                  | 21822                                  | -8.73       | 0.033472 |
| trefoil factor 3, intestinal                                                                                                                                                                                                                                        | Tff3                                              | immune response                  | 21786                                  | -31.43      | 0.016602 |
|                                                                                                                                                                                                                                                                     | Agpat2                                            | lipid metabolism                 | 67512                                  | -3.66       | 0.005536 |
| 1-acylglycerol-3-phosphate O-acyltransferase 2 (lysophosphatidic acid acyltransferase, beta)                                                                                                                                                                        |                                                   |                                  |                                        |             |          |
| 1-acylglycerol-3-phosphate O-acyltransferase 3                                                                                                                                                                                                                      | Agpat3                                            | lipid metabolism                 | 28169                                  | -2.98       | 0.000137 |

| GENE                                                                              | GENE SYMBOL      | GENE ONTOLOGY BIOLOGICAL PROCESS | GENE ID           | FOLD CHANGE | P VALUE  |
|-----------------------------------------------------------------------------------|------------------|----------------------------------|-------------------|-------------|----------|
| 7-dehydrocholesterol reductase                                                    | Dhcr7            | lipid metabolism                 | 13360             | -2.56       | 0.004445 |
| acetyl-Coenzyme A acyltransferase 1 /// acetyl-Coenzyme A acyltransferase 1B      | Acaa1 /// Acaa1b | lipid metabolism                 | 113868 /// 235674 | -4.44       | 0.003672 |
| acetyl-Coenzyme A acyltransferase 1B                                              | Acaa1b           | lipid metabolism                 | 235674            | -71.44      | 0.010596 |
| acetyl-Coenzyme A acyltransferase 2 (mitochondrial 3-oxoacyl-Coenzyme A thiolase) | Acaa2            | lipid metabolism                 | 52538             | -3.54       | 0.008544 |
| acyl-CoA thioesterase 12                                                          | Acot12           | lipid metabolism                 | 74156             | -69         | 0.015363 |
| acyl-CoA synthetase long-chain family member 1                                    | Acs1             | lipid metabolism                 | 14081             | -3.56       | 0.001591 |
| acyl-CoA synthetase medium-chain family member 3                                  | Acsm3            | lipid metabolism                 | 20216             | -5.45       | 0.00339  |
| acyl-CoA thioesterase 4                                                           | Acot4            | lipid metabolism                 | 171282            | -2.93       | 0.009887 |
| acyl-Coenzyme A binding domain containing 3                                       | Acbd3            | lipid metabolism                 | 170760            | -3.25       | 0.010533 |
| acyl-Coenzyme A oxidase 1, palmitoyl                                              | Acox1            | lipid metabolism                 | 11430             | -13.1       | 0.021528 |
| acyl-Coenzyme A oxidase 2, branched chain                                         | Acox2            | lipid metabolism                 | 93732             | -17.7       | 0.000695 |
| aldo-keto reductase family 1, member C20                                          | Akr1c20          | lipid metabolism                 | 116852            | -8.64       | 0.041331 |
| aldo-keto reductase family 1, member C6                                           | Akr1c6           | lipid metabolism                 | 83702             | -28.03      | 0.027685 |
| apolipoprotein A-I                                                                | Apoa1            | lipid metabolism                 | 11806             | -4.95       | 0.002297 |
| apolipoprotein A-II                                                               | Apoa2            | lipid metabolism                 | 11807             | -5.3        | 0.000834 |
| apolipoprotein B                                                                  | Apob             | lipid metabolism                 | 238055            | -421.14     | 0.048419 |
| apolipoprotein C-II                                                               | Apoc2            | lipid metabolism                 | 11813             | -14.72      | 0.008305 |
| apolipoprotein C-III                                                              | Apoc3            | lipid metabolism                 | 11814             | -26.11      | 0.022446 |
| apolipoprotein C-IV                                                               | Apoc4            | lipid metabolism                 | 11425             | -3.48       | 0.002002 |
| apolipoprotein E                                                                  | ApoE             | lipid metabolism                 | 11816             | -2.55       | 0.001165 |
| apolipoprotein M                                                                  | Apom             | lipid metabolism                 | 55938             | -3.55       | 0.000101 |
| ATPase, class I, type 8B, member 1                                                | Atp8b1           | lipid metabolism                 | 54670             | -2.76       | 0.007388 |
| carnitine O-octanoyltransferase                                                   | Crot             | lipid metabolism                 | 74114             | -5.67       | 0.011524 |
| carnitine palmitoyltransferase 1a, liver                                          | Cpt1a            | lipid metabolism                 | 12894             | -2.94       | 0.044126 |
| dehydrogenase/reductase (SDR family) member 8                                     | Dhrs8            | lipid metabolism                 | 114664            | -5.33       | 0.017881 |
| diacylglycerol O-acyltransferase 2                                                | Dgat2            | lipid metabolism                 | 67800             | -2.83       | 0.003301 |
| elongation of very long chain fatty acids (FEN1/Elo2, SUR4/Elo3, yeast)-like 2    | Elovl2           | lipid metabolism                 | 54326             | -18.34      | 0.007799 |
| emopamil binding protein-like                                                     | Ebpl             | lipid metabolism                 | 68177             | -4.24       | 0.0109   |
| enoyl coenzyme A hydratase 1, peroxisomal                                         | Ech1             | lipid metabolism                 | 51798             | -3.43       | 0.008925 |
| enoyl-Coenzyme A, hydratase/3-hydroxyacyl Coenzyme A dehydrogenase                | Ehhadh           | lipid metabolism                 | 74147             | -13.37      | 0.029944 |
| fatty acid binding protein 1, liver                                               | Fabp1            | lipid metabolism                 | 14080             | -8.34       | 0.0012   |
| fatty acid desaturase 1                                                           | Fads1            | lipid metabolism                 | 76267             | -2.66       | 0.014768 |
| fatty acid desaturase 2                                                           | Fads2            | lipid metabolism                 | 56473             | -5.83       | 0.04425  |
| high density lipoprotein (HDL) binding protein                                    | Hdlbp            | lipid metabolism                 | 110611            | -2.67       | 0.005459 |
| hydroxy-delta-5-steroid dehydrogenase, 3 beta-and steroid delta-isomerase 7       | Hsd3b7           | lipid metabolism                 | 101502            | -13.81      | 0.00279  |
| hydroxysteroid (17-beta) dehydrogenase 2                                          | Hsd17b2          | lipid metabolism                 | 15486             | -41.68      | 0.005435 |
| hydroxysteroid (17-beta) dehydrogenase 4                                          | Hsd17b4          | lipid metabolism                 | 15488             | -2.89       | 0.002972 |
| hydroxysteroid (17-beta) dehydrogenase 7                                          | Hsd17b7          | lipid metabolism                 | 15490             | -4.58       | 0.001267 |

| GENE                                                                                                | GENE SYMBOL     | GENE ONTOLOGY BIOLOGICAL PROCESS | GENE ID         | FOLD CHANGE | P VALUE  |
|-----------------------------------------------------------------------------------------------------|-----------------|----------------------------------|-----------------|-------------|----------|
| hydroxysteroid 11-beta dehydrogenase 1                                                              | Hsd11b1         | lipid metabolism                 | 15483           | -5.81       | 0.001914 |
| hydroxysteroid dehydrogenase-1, delta<5>-3-beta                                                     | Hsd3b1          | lipid metabolism                 | 15492           | -34.67      | 0.000105 |
| hydroxysteroid dehydrogenase-2, delta<5>-3-beta                                                     | Hsd3b2          | lipid metabolism                 | 15493           | -4.66       | 0.020024 |
| hydroxysteroid dehydrogenase-2, delta<5>-3-beta /// hydroxysteroid dehydrogenase-6, delta<5>-3-beta | Hsd3b2///Hsd3b6 | lipid metabolism                 | 15493 /// 15497 | -3.15       | 0.001761 |
| hydroxysteroid dehydrogenase-3, delta<5>-3-beta                                                     | Hsd3b3          | lipid metabolism                 | 15494           | -6.93       | 0.002647 |
| insulin induced gene 1                                                                              | Insig1          | lipid metabolism                 | 231070          | -4.28       | 0.049651 |
| lanosterol synthase                                                                                 | Lss             | lipid metabolism                 | 16987           | -2.95       | 0.031145 |
| lecithin cholesterol acyltransferase                                                                | Lcat            | lipid metabolism                 | 16816           | -8.01       | 0.00349  |
| lipase, hepatic                                                                                     | Lipc            | lipid metabolism                 | 15450           | -28.7       | 0.000926 |
| lipin 1                                                                                             | Lpin1           | lipid metabolism                 | 14245           | -8.4        | 0.0004   |
| lysosomal acid lipase 1                                                                             | Lip1            | lipid metabolism                 | 16889           | -3.24       | 0.000431 |
| microsomal triglyceride transfer protein                                                            | Mttp            | lipid metabolism                 | 17777           | -4.69       | 0.000012 |
| paraoxonase 1                                                                                       | Pon1            | lipid metabolism                 | 18979           | -5.29       | 0.000162 |
| peroxisomal trans-2-enoyl-CoA reductase                                                             | Pecr            | lipid metabolism                 | 111175          | -3.42       | 0.000164 |
|                                                                                                     | Pcyt2           | lipid metabolism                 | 68671           | -3.13       | 0.000352 |
| phosphate cytidyltransferase 2, ethanolamine                                                        | Ppap2b          | lipid metabolism                 | 67916           | -4.4        | 0.000563 |
| phosphatidic acid phosphatase type 2B                                                               | Pemt            | lipid metabolism                 | 18618           | -5.97       | 0.001015 |
| phosphatidylethanolamine N-methyltransferase                                                        | Pla1a           | lipid metabolism                 | 85031           | -3.29       | 0.002231 |
| phospholipase A1 member A                                                                           | Pla2g12b        | lipid metabolism                 | 69836           | -21.55      | 0.000089 |
| phospholipase A2, group XIIB                                                                        | Phyh2           | lipid metabolism                 | 56794           | -59.61      | 0.003495 |
| phytanoyl-CoA 2-hydroxylase 2                                                                       | Phyh            | lipid metabolism                 | 16922           | -7.88       | 0.003034 |
| phytanoyl-CoA hydroxylase                                                                           | Slc27a2         | lipid metabolism                 | 26458           | -9.1        | 0.001764 |
| solute carrier family 27 (fatty acid transporter), member 2                                         |                 |                                  |                 |             |          |
| solute carrier family 27 (fatty acid transporter), member 5                                         | Slc27a5         | lipid metabolism                 | 26459           | -15.6       | 0.001544 |
| sulfotransferase family 1A, phenol-preferring, member 1                                             | Sult1a1         | lipid metabolism                 | 20887           | -32.67      | 0.003685 |
| transmembrane 7 superfamily member 2                                                                | Tm7sf2          | lipid metabolism                 | 73166           | -4.43       | 0.000154 |
| UDP-glucuronosyltransferase 2                                                                       | Ugt2b36         | metabolism                       | 231396          | -3.72       | 0.009493 |
| familypolypeptide B36                                                                               |                 |                                  |                 |             |          |
| 2,4-dienoyl CoA reductase 1, mitochondrial                                                          | Decr1           | metabolism                       | 67460           | -2.75       | 0.000184 |
| 2-4-dienoyl-Coenzyme A reductase 2, peroxisomal                                                     | Decr2           | metabolism                       | 26378           | -6.25       | 0.000026 |
| 3-hydroxyanthranilate 3,4-dioxygenase                                                               | Hao             | metabolism                       | 107766          | -10.23      | 0.002294 |
| 3-hydroxybutyrate dehydrogenase (heart, mitochondrial)                                              | Bdh             | metabolism                       | 71911           | -6.83       | 0.000351 |
| 3-hydroxyisobutyryl-Coenzyme A hydrolase                                                            | Hibch           | metabolism                       | 227095          | -2.55       | 0.003566 |
| 4-aminobutyrate aminotransferase                                                                    | Abat            | metabolism                       | 268860          | -9.24       | 0.027017 |
| aconitase 1                                                                                         | Aco1            | metabolism                       | 11428           | -2.54       | 0.009206 |
| alanine-glyoxylate aminotransferase                                                                 | Agxt            | metabolism                       | 11611           | -18.59      | 0.006058 |

| GENE                                                                                   | GENE SYMBOL        | GENE ONTOLOGY BIOLOGICAL<br>PROCESS | GENE ID          | FOLD CHANGE | P VALUE  |
|----------------------------------------------------------------------------------------|--------------------|-------------------------------------|------------------|-------------|----------|
| alcohol dehydrogenase 1 (class I)                                                      | Adh1               | metabolism                          | 11522            | -8.83       | 0.000205 |
| alcohol dehydrogenase, iron containing, 1                                              | Adhfe1             | metabolism                          | 76187            | -3.4        | 0.001274 |
| aldehyde dehydrogenase 8 family, member A1                                             | Aldh8a1            | metabolism                          | 237320           | -59.12      | 0.019353 |
| aldehyde dehydrogenase family 3, subfamily A2                                          | Aldh3a2            | metabolism                          | 11671            | -5.82       | 0.002932 |
| aldehyde dehydrogenase family 6, subfamily A1                                          | Aldh6a1            | metabolism                          | 104776           | -3.04       | 0.00156  |
| aldo-keto reductase family 1, member C12, C13                                          | Akr1C12 ///Akr1C13 | metabolism                          | 622402 /// 27384 | -2.65       | 0.009834 |
| aldo-keto reductase family 1, member C13                                               | Akr1c13            | metabolism                          | 27384            | -3.05       | 0.006718 |
| aminoacidpate aminotransferase                                                         | Aadat              | metabolism                          | 23923            | -66.41      | 0.000221 |
| arylacетamide deacetylase (esterase)                                                   | Aadac              | metabolism                          | 67758            | -49.59      | 0.00437  |
| biphenyl hydrolase-like (serine hydrolase, breast epithelial mucin-associated antigen) | Bphl               | metabolism                          | 68021            | -2.75       | 0.000137 |
| butyrobetaine (gamma), 2-oxoglutarate dioxygenase 1 (gamma-butyrobetaine hydroxylase)  | Bbox1              | metabolism                          | 170442           | -8.72       | 0.001218 |
| butyryl Coenzyme A synthetase 1                                                        | Bucs1              | metabolism                          | 117147           | -23.87      | 0.000276 |
| carbonic anhydrase 8                                                                   | Car8               | metabolism                          | 12319            | -2.52       | 0.015332 |
| carbonyl reductase 1                                                                   | Cbr1               | metabolism                          | 12408            | -3.07       | 0.001259 |
| carboxylesterase 3                                                                     | Ces3               | metabolism                          | 104158           | -144.97     | 0.017646 |
| carboxylesterase 6                                                                     | Ces6               | metabolism                          | 102022           | -29.66      | 0.001164 |
| D-dopachrome tautomerase                                                               | Ddt                | metabolism                          | 13202            | -2.89       | 0.003294 |
| dehydrogenase/reductase (SDR family) member 4                                          | Dhrs4              | metabolism                          | 28200            | -2.8        | 0.0026   |
| dimethylarginine dimethylaminohydrolase 1                                              | Ddah1              | metabolism                          | 69219            | -3.02       | 0.005823 |
| dopachrome tautomerase                                                                 | Dct                | metabolism                          | 13190            | -2.77       | 0.008795 |
| enoyl Coenzyme A hydratase domain containing 2                                         | Echdc2             | metabolism                          | 52430            | -3.5        | 0.00184  |
| enoyl Coenzyme A hydratase domain containing 3                                         | Echdc3             | metabolism                          | 67856            | -4.54       | 0.000663 |
| epoxide hydrolase 2, cytoplasmic                                                       | Ephx2              | metabolism                          | 13850            | -15.25      | 0.000828 |
| folylpolyglutamyl synthetase                                                           | Fpgs               | metabolism                          | 14287            | -2.65       | 0.00236  |
| formyltetrahydrofolate dehydrogenase                                                   | Fthfd              | metabolism                          | 107747           | -8.24       | 0.000459 |
| gamma-glutamyltransferase 1                                                            | Ggt1               | metabolism                          | 14598            | -13.97      | 0.002255 |
| glucosamine                                                                            | Gne                | metabolism                          | 50798            | -2.71       | 0.013356 |
| glutathione S-transferase kappa 1                                                      | Gstk1              | metabolism                          | 76263            | -3.01       | 0.022781 |
| glutathione S-transferase, alpha 3                                                     | Gsta3              | metabolism                          | 14859            | -16.55      | 0.005145 |
| glutathione S-transferase, alpha 4                                                     | Gsta4              | metabolism                          | 14860            | -2.81       | 0.000133 |
| glutathione S-transferase, mu 7                                                        | Gstm7              | metabolism                          | 68312            | -3.28       | 0.02711  |
| glycine C-acetyltransferase (2-amino-3-ketobutyrate-coenzyme A ligase)                 | Gcat               | metabolism                          | 26912            | -3.96       | 0.001756 |
| glycine N-methyltransferase                                                            | Gnmt               | metabolism                          | 14711            | -18.54      | 0.016978 |
| guanidinoacetate methyltransferase                                                     | Gamt               | metabolism                          | 14431            | -3.03       | 0.001798 |
| hydroxysteroid (17-beta) dehydrogenase 13                                              | Hsd17b13           | metabolism                          | 243168           | -1766.89    | 0.002961 |
| lipoma HMGIC fusion partner-like 2                                                     | Lhfpl2             | metabolism                          | 218454           | -3.59       | 0.003239 |
| mitochondrial glutathione S-transferase 1                                              | Mgst1              | metabolism                          | 56615            | -3.29       | 0.002702 |



| GENE                                                                                                                                                  | GENE SYMBOL                                                         | GENE ONTOLOGY BIOLOGICAL PROCESS | GENE ID                                                                                    | FOLD CHANGE | P VALUE  |
|-------------------------------------------------------------------------------------------------------------------------------------------------------|---------------------------------------------------------------------|----------------------------------|--------------------------------------------------------------------------------------------|-------------|----------|
| molybdenum cofactor synthesis 2                                                                                                                       | Mocs2                                                               | metabolism                       | 17434                                                                                      | -3.42       | 0.000569 |
| nitrilase 1                                                                                                                                           | Nit1                                                                | metabolism                       | 27045                                                                                      | -3.53       | 0.010424 |
| nudix (nucleoside diphosphate linked moiety X)-type motif 12 p                                                                                        | Nudt12                                                              | metabolism                       | 67993                                                                                      | -2.78       | 0.000825 |
| pantothenate kinase 1                                                                                                                                 | Pank1                                                               | metabolism                       | 75735                                                                                      | -3.86       | 0.000533 |
| phosphotriesterase related                                                                                                                            | Pter                                                                | metabolism                       | 19212                                                                                      | -3.45       | 0.01784  |
| propionyl-Coenzyme A carboxylase, alpha polypeptide                                                                                                   | Pcca                                                                | metabolism                       | 110821                                                                                     | -2.56       | 0.002951 |
| pyridoxal (pyridoxine, vitamin b6) kinase                                                                                                             | Pdxk                                                                | metabolism                       | 216134                                                                                     | -2.98       | 0.000456 |
| retinol dehydrogenase 5                                                                                                                               | Rdh5                                                                | metabolism                       | 19682                                                                                      | -3.05       | 0.0059   |
| retinol dehydrogenase 7                                                                                                                               | Rdh7                                                                | metabolism                       | 54150                                                                                      | -68.31      | 0.000191 |
| RIKEN cDNA 2310016A09 gene                                                                                                                            | 2310016A09Rik                                                       | metabolism                       | 69574                                                                                      | -9.14       | 0.001582 |
| RIKEN cDNA A530016O06 gene                                                                                                                            | A530016O06Rik                                                       | metabolism                       | 319660                                                                                     | -27.18      | 0.01509  |
| S-adenosylhomocysteine hydrolase                                                                                                                      | Ahcy                                                                | metabolism                       | 269378                                                                                     | -2.66       | 0.000441 |
| sulfotransferase family 1D, member 1                                                                                                                  | Sult1d1                                                             | metabolism                       | 53315                                                                                      | -259.05     | 0.007114 |
| transferrin receptor 2                                                                                                                                | Trfr2                                                               | metabolism                       | 50765                                                                                      | -7.29       | 0.00445  |
| UDP glucuronosyltransferase 2 family, polypeptide B1                                                                                                  | Ugt2b1                                                              | metabolism                       | 71773                                                                                      | -3.08       | 0.003075 |
| UDP glycosyltransferase 1 family, polypeptide A10; polypeptide A5; polypeptide A6; polypeptide A12; polypeptide A9; polypeptide A13; member1; member2 | Ugt1a2///Ugt1a10///Ugt1a5///Ugt1a9///Ugt1a6b<br>///Ugt1a1///Ugt1a6a | metabolism                       | 22236 /// 394430 ///<br>394432 /// 394433 ///<br>394434 /// 394435 ///<br>394436 /// 94284 | -12.96      | 0.008605 |
| UDP-glucuronosyltransferase 2 family, member 5                                                                                                        | Ugt2b5                                                              | metabolism                       | 22238                                                                                      | -5.92       | 0.000349 |
| ureidopropionase, beta                                                                                                                                | Upb1                                                                | metabolism                       | 103149                                                                                     | -50.73      | 0.005637 |
| vanin 1                                                                                                                                               | Vnn1                                                                | metabolism                       | 22361                                                                                      | -7.87       | 0.027252 |
| 5' nucleotidase, ecto                                                                                                                                 | Nt5e                                                                | nucleic acid metabolism          | 23959                                                                                      | -5.39       | 0.008492 |
| adenosine kinase                                                                                                                                      | Adk                                                                 | nucleic acid metabolism          | 11534                                                                                      | -5.53       | 0.040911 |
| adenylate kinase 3 alpha-like 1                                                                                                                       | Ak3l1                                                               | nucleic acid metabolism          | 56248                                                                                      | -8.22       | 0.000765 |
| deoxyribonuclease II alpha                                                                                                                            | Dnase2a                                                             | nucleic acid metabolism          | 13423                                                                                      | -3.59       | 0.000859 |
| ectonucleotide                                                                                                                                        | Enpp2                                                               | nucleic acid metabolism          | 18606                                                                                      | -7.21       | 0.001725 |
| pyrophosphatase/phosphodiesterase 2 methyltransferase-like 3                                                                                          | Mettl3                                                              | nucleic acid metabolism          | 56335                                                                                      | -4.99       | 0.002823 |
| quinolinate phosphoribosyltransferase                                                                                                                 | Qprt                                                                | nucleic acid metabolism          | 67375                                                                                      | -12.14      | 0.00768  |
| urate oxidase                                                                                                                                         | Uox                                                                 | nucleic acid metabolism          | 22262                                                                                      | -8.97       | 0.007131 |
| uridine phosphorylase 2                                                                                                                               | Upp2                                                                | nucleic acid metabolism          | 76654                                                                                      | -109.58     | 0.033834 |
| peroxisomal membrane protein 2                                                                                                                        | Pxmp2                                                               | peroxisome organization          | 19301                                                                                      | -2.62       | 0.000737 |
| alpha-2-macroglobulin                                                                                                                                 | A2m                                                                 | protease inhibitor               | 232345                                                                                     | -87.66      | 0.010845 |
| caseinolytic protease X (E.coli)                                                                                                                      | Clpx                                                                | protein folding/ modification    | 270166                                                                                     | -4.8        | 0.005327 |
| CDC14 cell division cycle 14 homolog B (S. cerevisiae)                                                                                                | Cdc14b                                                              | protein folding/ modification    | 218294                                                                                     | -3.31       | 0.002106 |
| chaperone, ABC1 activity of bc1 complex like (S. pombe)                                                                                               | Cabc1                                                               | protein folding/ modification    | 67426                                                                                      | -2.6        | 0.001195 |
| dual specificity phosphatase 9                                                                                                                        | Dusp9                                                               | protein folding/ modification    | 75590                                                                                      | -2.75       | 0.003992 |
| F-box protein 42                                                                                                                                      | Fbxo42                                                              | protein folding/ modification    | 213499                                                                                     | -4.86       | 0.001714 |
| FK506 binding protein 5                                                                                                                               | Fkbp5                                                               | protein folding/ modification    | 14229                                                                                      | -2.83       | 0.006351 |

| GENE                                                                                                | GENE SYMBOL   | GENE ONTOLOGY BIOLOGICAL PROCESS | GENE ID | FOLD CHANGE | P VALUE  |
|-----------------------------------------------------------------------------------------------------|---------------|----------------------------------|---------|-------------|----------|
| homocysteine-inducible, endoplasmic reticulum stress-inducible, ubiquitin-like domain member 1      | Herpud1       | protein folding/ modification    | 64209   | -2.63       | 0.000053 |
| neural precursor cell expressed, developmentally down-regulated gene 4-like                         | Nedd4l        | protein folding/ modification    | 83814   | -2.95       | 0.002322 |
| protein phosphatase 1K (PP2C domain containing)                                                     | Ppm1k         | protein folding/ modification    | 243382  | -3.24       | 0.000092 |
| protein tyrosine phosphatase-like (proline instead of catalytic arginine), member b                 | Ptplb         | protein folding/ modification    | 70757   | -2.52       | 0.00346  |
| RIKEN cDNA 2810451A06 gene                                                                          | 2810451A06Rik | protein folding/ modification    | 72778   | -26.55      | 0.008463 |
| ubiquitin specific protease 8                                                                       | Usp8          | protein folding/ modification    | 84092   | -3.69       | 0.004792 |
| ubiquitin-conjugating enzyme E2D 2                                                                  | Ube2d2        | protein folding/ modification    | 56550   | -2.53       | 0.00616  |
| calpain 10                                                                                          | Capn10        | proteolysis                      | 23830   | -3.15       | 0.001895 |
| cathepsin H                                                                                         | Ctsh          | proteolysis                      | 13036   | -2.92       | 0.001147 |
| cathepsin L                                                                                         | Ctsl          | proteolysis                      | 13039   | -2.95       | 0.000396 |
| expressed sequence AI317395                                                                         | AI317395      | proteolysis                      | 215929  | -3.87       | 0.022797 |
| hepsin                                                                                              | Hpn           | proteolysis                      | 15451   | -3.45       | 0.007188 |
| inter alpha-trypsin inhibitor, heavy chain 4                                                        | Itih4         | proteolysis                      | 16427   | -95.83      | 0.000673 |
| inter-alpha trypsin inhibitor, heavy chain 1                                                        | Itih1         | proteolysis                      | 16424   | -4.14       | 0.000952 |
| RIKEN cDNA 1300002A08 gene                                                                          | 1300002A08Rik | proteolysis                      | 66887   | -2.67       | 0.002029 |
| RIKEN cDNA 4732466D17 gene                                                                          | 4732466D17Rik | proteolysis                      | 212933  | -2.88       | 0.013522 |
| ring finger protein 128                                                                             | Rnf128        | proteolysis                      | 66889   | -2.78       | 0.002135 |
| ring finger protein 13                                                                              | Rnf13         | proteolysis                      | 24017   | -2.65       | 0.015319 |
| serine (or cysteine) proteinase inhibitor, clade A (alpha-1 antiproteinase, antitrypsin), member 11 | Serpina11     | proteolysis                      | 380780  | -2.98       | 0.002215 |
| transmembrane serine protease 6                                                                     | Tmprss6       | proteolysis                      | 71753   | -3.99       | 0.001486 |
| small nuclear ribonucleoprotein D3                                                                  | Snrpd3        | RNA splicing                     | 67332   | -3.53       | 0.007265 |
| adenosine A1 receptor                                                                               | Adora1        | signal transduction              | 11539   | -3.52       | 0.01152  |
| ankyrin repeat and SOCS box-containing protein 13                                                   | Asb13         | signal transduction              | 142688  | -3.24       | 0.018409 |
| bone morphogenetic protein 1                                                                        | Bmp1          | signal transduction              | 12153   | -4.83       | 0.019181 |
| breast cancer anti-estrogen resistance 3                                                            | Bcar3         | signal transduction              | 29815   | -2.84       | 0.018055 |
| DEP domain containing 6                                                                             | Depdc6        | signal transduction              | 97998   | -2.57       | 0.00523  |
| epidermal growth factor receptor                                                                    | Egfr          | signal transduction              | 13649   | -17.09      | 0.013761 |
| G protein-coupled receptor 120                                                                      | Gpr120        | signal transduction              | 107221  | -2.9        | 0.036845 |
| G protein-coupled receptor 64                                                                       | Gpr64         | signal transduction              | 237175  | -4.84       | 0.0231   |
| growth factor receptor bound protein 10                                                             | Grb10         | signal transduction              | 14783   | -2.74       | 0.042944 |
| growth factor receptor bound protein 7                                                              | Grb7          | signal transduction              | 14786   | -2.58       | 0.001092 |
| growth hormone receptor                                                                             | Ghr           | signal transduction              | 14600   | -3.67       | 0.005965 |
| insulin-like growth factor binding protein 2                                                        | Igfbp2        | signal transduction              | 16008   | -55.7       | 0.002748 |
| insulin-like growth factor binding protein 4                                                        | Igfbp4        | signal transduction              | 16010   | -2.57       | 0.0313   |
| interleukin 1 receptor accessory protein                                                            | Il1rap        | signal transduction              | 16180   | -6.94       | 0.005212 |
| membrane-spanning 4-domains, subfamily A, member 1                                                  | Ms4a1         | signal transduction              | 12482   | -2.66       | 0.020135 |
| mitogen activated protein kinase kinase kinase 1                                                    | Map4k1        | signal transduction              | 26411   | -7.54       | 0.004925 |

| GENE                                                                               | GENE SYMBOL | GENE ONTOLOGY BIOLOGICAL PROCESS | GENE ID | FOLD CHANGE | P VALUE  |
|------------------------------------------------------------------------------------|-------------|----------------------------------|---------|-------------|----------|
| neuronal guanine nucleotide exchange factor                                        | Ngef        | signal transduction              | 53972   | -3.8        | 0.018865 |
| PDZ domain containing 1                                                            | Pdzk1       | signal transduction              | 59020   | -4.08       | 0.013372 |
| prolactin receptor                                                                 | Prlr        | signal transduction              | 19116   | -4.27       | 0.028751 |
| Ras association (RalGDS/AF-6) domain family                                        | Rassf8      | signal transduction              | 101333  | -2.78       | 0.001329 |
| RAS protein activator like 2                                                       | Rasal2      | signal transduction              | 320357  | -300.11     | 0.000214 |
| regulator of G-protein signaling 16                                                | Rgs16       | signal transduction              | 19734   | -9.39       | 0.01129  |
| sorbin and SH3 domain containing 2                                                 | Sorbs2      | signal transduction              | 234214  | -7.66       | 0.013841 |
| suppressor of cytokine signaling 2                                                 | Socs2       | signal transduction              | 216233  | -3.82       | 0.002603 |
| V-erb-b2 erythroblastic leukemia viral oncogene homolog 3 (avian)                  | ErbB3       | signal transduction              | 13867   | -10.6       | 0.000269 |
| wnt inhibitory factor 1                                                            | Wif1        | signal transduction              | 24117   | -16.51      | 0.038749 |
| activating transcription factor 5                                                  | Atf5        | transcription                    | 107503  | -4.25       | 0.000344 |
| ankyrin repeat and KH domain containing 1                                          | Ankhd1      | transcription                    | 108857  | -10.78      | 0.021281 |
| CCAAT/enhancer binding protein (C/EBP), alpha                                      | Cebpa       | transcription                    | 12606   | -3.38       | 0.000558 |
| forkhead box Q1                                                                    | Foxq1       | transcription                    | 15220   | -4.67       | 0.005571 |
| interferon regulatory factor 6                                                     | Irf6        | transcription                    | 54139   | -3.08       | 0.002615 |
| kruppel-like factor 15                                                             | Klf15       | transcription                    | 66277   | -3.78       | 0.000369 |
| kuppel-like factor 12                                                              | Klf12       | transcription                    | 16597   | -3.02       | 0.031582 |
| nuclear factor of activated T-cells, cytoplasmic, calcineurin-dependent 3          | Nfatc3      | transcription                    | 18021   | -3.72       | 0.000618 |
| nuclear factor, interleukin 3, regulated                                           | Nfil3       | transcription                    | 18030   | -3.01       | 0.027745 |
| nuclear receptor subfamily 1, group H, member 4                                    | Nr1h4       | transcription                    | 20186   | -3.43       | 0.013871 |
| nuclear receptor subfamily 1, group I, member 2                                    | Nr1i2       | transcription                    | 18171   | -2.85       | 0.008637 |
| one cut domain, family member 1                                                    | Onecut1     | transcription                    | 15379   | -5          | 0.000049 |
| RAR-related orphan receptor alpha                                                  | Rora        | transcription                    | 19883   | -4.46       | 0.005403 |
| Sal-like 1                                                                         | Sall1       | transcription                    | 58198   | -10.4       | 0.000616 |
| SEC14-like 2 (S. cerevisiae)                                                       | Sec14l2     | transcription                    | 67815   | -7.37       | 0.015111 |
| sirtuin 3 (silent mating type information regulation 2, homolog) 3 (S. cerevisiae) | Sirt3       | transcription                    | 64384   | -5.18       | 0.00497  |
| aquaporin 11                                                                       | Aqp11       | transport                        | 66333   | -4.38       | 0.002865 |
| aquaporin 9                                                                        | Aqp9        | transport                        | 64008   | -5.85       | 0.00198  |
| ATP-binding cassette, sub-family A (ABC1), member 1                                | Abca1       | transport                        | 11303   | -3.3        | 0.019625 |
| ATP-binding cassette, sub-family B (MDR/TAP), member 11                            | Abcb11      | transport                        | 27413   | -1480.96    | 0.014353 |
| ATP-binding cassette, sub-family D (ALD), member 2                                 | Abcd2       | transport                        | 26874   | -7.1        | 0.019279 |
| cDNA sequence BC011209                                                             | BC011209    | transport                        | 217721  | -3.04       | 0.006628 |
| ceruloplasmin                                                                      | Cp          | transport                        | 12870   | -10.8       | 0.029816 |
| copper chaperone for superoxide dismutase                                          | Ccs         | transport                        | 12460   | -3.92       | 0.00014  |
| diazepam binding inhibitor                                                         | Dbi         | transport                        | 13167   | -3.02       | 0.001436 |
| expressed sequence AI132487                                                        | AI132487    | transport                        | 104910  | -9.83       | 0.002087 |
| hemopexin                                                                          | Hpxn        | transport                        | 15458   | -12.38      | 0.001066 |

| GENE                                                                                                 | GENE SYMBOL   | GENE ONTOLOGY BIOLOGICAL<br>PROCESS | GENE ID | FOLD CHANGE | P VALUE  |
|------------------------------------------------------------------------------------------------------|---------------|-------------------------------------|---------|-------------|----------|
| MOCO sulphurase C-terminal domain containing 2                                                       | Mosc2         | transport                           | 67247   | -2.93       | 0.000605 |
| phosphatidylcholine transfer protein                                                                 | Pctp          | transport                           | 18559   | -4.8        | 0.049555 |
| purinergic receptor P2X, ligand-gated ion channel, 1                                                 | P2rx1         | transport                           | 18436   | -3.11       | 0.007825 |
| RAB4A, member RAS oncogene family                                                                    | Rab4a         | transport                           | 19341   | -3.9        | 0.000218 |
| retinol binding protein 1, cellular                                                                  | Rbp1          | transport                           | 19659   | -2.74       | 0.005107 |
| ribosome binding protein 1                                                                           | Rrbp1         | transport                           | 81910   | -3.1        | 0.003225 |
| RIKEN cDNA 1300017J02 gene                                                                           | 1300017J02Rik | transport                           | 71775   | -3.3        | 0.000021 |
| RIKEN cDNA 1700013L23 gene                                                                           | 1700013L23Rik | transport                           | 69379   | -3.36       | 0.004144 |
| RIKEN cDNA C730036D15 gene                                                                           | C730036D15Rik | transport                           | 209186  | -3.96       | 0.037848 |
| sideroflexin 2                                                                                       | Sfxn2         | transport                           | 94279   | -3.24       | 0.011657 |
| solute carrier family 10 (sodium/bile acid cotransporter family), member 1                           | Slc10a1       | transport                           | 20493   | -73.11      | 0.000742 |
| solute carrier family 13 (sodium-dependent dicarboxylate transporter), member 3                      | Slc13a3       | transport                           | 114644  | -2.68       | 0.028604 |
| solute carrier family 16 (monocarboxylic acid transporters), member 7                                | Slc16a7       | transport                           | 20503   | -3.45       | 0.002648 |
| solute carrier family 17 (sodium phosphate), member 2                                                | Slc17a2       | transport                           | 218103  | -10.02      | 0.008077 |
| solute carrier family 20, member 2                                                                   | Slc20a2       | transport                           | 20516   | -2.9        | 0.00102  |
| solute carrier family 25 (mitochondrial carrier ornithine transporter), member 15                    | Slc25a15      | transport                           | 18408   | -2.71       | 0.029054 |
| solute carrier family 25 (mitochondrial carrier, adenine nucleotide translocator), member 13         | Slc25a13      | transport                           | 50799   | -4.11       | 0.00008  |
| solute carrier family 26 (sulfate transporter), member 1                                             | Slc26a1       | transport                           | 231583  | -3.86       | 0.004514 |
| solute carrier family 35 (UDP-glucuronic acid/UDP-N-acetylgalactosamine dual transporter), member D1 | Slc35d1       | transport                           | 242585  | -2.95       | 0.000379 |
| solute carrier family 37 (glycerol-6-phosphate transporter), member 4                                | Slc37a4       | transport                           | 14385   | -4.96       | 0.007984 |
| solute carrier family 38, member 3                                                                   | Slc38a3       | transport                           | 76257   | -11.75      | 0.002344 |
| solute carrier family 39 (metal ion transporter), member 5                                           | Slc39a5       | transport                           | 72002   | -3.96       | 0.002831 |
| solute carrier family 39 (zinc transporter), member 14                                               | Slc39a14      | transport                           | 213053  | -5.68       | 0.000898 |
| solute carrier family 39 (zinc transporter), member 4                                                | Slc39a4       | transport                           | 72027   | -11.42      | 0.022058 |
| Solute carrier family 4 (anion exchanger), member 4                                                  | Slc4a4        | transport                           | 54403   | -2.65       | 0.008333 |
| solute carrier family 6 (neurotransmitter transporter, GABA), member 13                              | Slc6a13       | transport                           | 14412   | -11.3       | 0.000205 |
| solute carrier family 7 (cationic amino acid transporter, y+ system), member 2                       | Slc7a2        | transport                           | 11988   | -2.79       | 0.001054 |
| solute carrier family 9 (sodium/hydrogen exchanger), isoform 3 regulator 1                           | Slc9a3r1      | transport                           | 26941   | -2.74       | 0.003454 |

| GENE                                                                                               | GENE SYMBOL          | GENE ONTOLOGY BIOLOGICAL<br>PROCESS | GENE ID        | FOLD CHANGE | P VALUE  |
|----------------------------------------------------------------------------------------------------|----------------------|-------------------------------------|----------------|-------------|----------|
| solute carrier organic anion transporter family,<br>member 1b2                                     | Slco1b2              | transport                           | 28253          | -71         | 0.018046 |
| solute carrier organic anion transporter family,<br>member 2a1                                     | Slco2a1              | transport                           | 24059          | -3.67       | 0.000763 |
| StAR-related lipid transfer (START) domain<br>containing 5                                         | Stard5               | transport                           | 170460         | -6.68       | 0.000261 |
| sterol carrier protein 2, liver                                                                    | Scp2                 | transport                           | 20280          | -6.09       | 0.000004 |
| syntaxin binding protein 6 (amisyn)                                                                | Stxbp6               | transport                           | 217517         | -5.04       | 0.0016   |
| thiosulfate sulfurtransferase, mitochondrial                                                       | Tst                  | transport                           | 22117          | -3.04       | 0.019938 |
| tocopherol (alpha) transfer protein                                                                | Ttpa                 | transport                           | 50500          | -14.54      | 0.0025   |
| Insulin receptor substrate2///Riken cDNA<br>3930402G23 gene                                        | Irs2///3930402G23Rik | unknown                             | 384783///74027 | -3.25       | 0.010227 |
| 0 day neonate skin cDNA, RIKEN full-length<br>enriched library, clone:4632424N07                   |                      | unknown                             |                | -2.55       | 0.006627 |
| 3-hydroxy-3-methylglutaryl-Coenzyme A lyase                                                        | Hmgcl                | unknown                             | 15356          | -2.86       | 0.024109 |
| 4-nitrophenylphosphatase domain and non-<br>neuronal SNAP25-like protein homolog 1 (C.<br>elegans) | Nipsnap1             | unknown                             | 18082          | -4.42       | 0.000069 |
| A kinase (PRKA) anchor protein 1                                                                   | Akap1                | unknown                             | 11640          | -6.12       | 0.000973 |
| abhydrolase domain containing 1                                                                    | Abhd1                | unknown                             | 57742          | -3.59       | 0.001746 |
| abhydrolase domain containing 14b                                                                  | Abhd14b              | unknown                             | 76491          | -2.62       | 0.004136 |
| abhydrolase domain containing 3                                                                    | Abhd3                | unknown                             | 106861         | -15.26      | 0.002883 |
| acetyl-Coenzyme A acetyltransferase 1                                                              | Acat1                | unknown                             | 110446         | -3.68       | 0.000018 |
| agmatine ureohydrolase (agmatinase)                                                                | Agmat                | unknown                             | 75986          | -11.22      | 0.000552 |
| alanine-glyoxylate aminotransferase 2                                                              | Agxt2                | unknown                             | 268782         | -6.98       | 0.011308 |
| ankyrin repeat and BTB (POZ) domain<br>containing 2                                                | Abtb2                | unknown                             | 99382          | -3.53       | 0.000417 |
| apolipoprotein N                                                                                   | Apon                 | unknown                             | 28194          | -4.88       | 0.000395 |
| ATP-binding cassette, sub-family A (ABC1),<br>member 6                                             | Abca6                | unknown                             | 76184          | -3.61       | 0.002918 |
| brain protein 44-like                                                                              | Brp44l               | unknown                             | 55951          | -3.2        | 0.000649 |
| butyrylcholinesterase                                                                              | Bche                 | unknown                             | 12038          | -2.58       | 0.000446 |
| calmodulin-like 4                                                                                  | Calml4               | unknown                             | 75600          | -2.7        | 0.026569 |
| camello-like 1                                                                                     | Cml1                 | unknown                             | 66116          | -113.71     | 0.000005 |
| carboxypeptidase N, polypeptide 2                                                                  | Cpn2                 | unknown                             | 71756          | -38.09      | 0.000804 |
| CD302 antigen                                                                                      | Cd302                | unknown                             | 66205          | -3.29       | 0.000704 |
| cDNA sequence BC004004                                                                             | BC004004             | unknown                             | 80748          | -2.81       | 0.030755 |
| cDNA sequence BC006662                                                                             |                      | unknown                             | 223267         | -5.34       | 0.000199 |
| cDNA sequence BC010787                                                                             | BC010787             | unknown                             | 235043         | -4.25       | 0.000088 |
| cDNA sequence BC014685                                                                             | BC014685             | unknown                             | 232086         | -12.25      | 0.00006  |
| cDNA sequence BC014699                                                                             | BC014699             | unknown                             | 232146         | -7.31       | 0.001648 |
| cDNA sequence BC021608                                                                             | BC021608             | unknown                             | 192653         | -8.27       | 0.000223 |
| cDNA sequence BC021614                                                                             | BC021614             | unknown                             | 225884         | -5.41       | 0.000968 |
| cDNA sequence BC040756                                                                             | BC040756             | unknown                             | 414073         | -7.05       | 0.006582 |
| DEAD (Asp-Glu-Ala-Asp) box polypeptide 27                                                          | Ddx27                | unknown                             | 228889         | -2.97       | 0.003745 |
| dihydropyrimidinase                                                                                | Dpys                 | unknown                             | 64705          | -14.07      | 0.000147 |

| GENE                                                                                                                    | GENE SYMBOL          | GENE ONTOLOGY BIOLOGICAL<br>PROCESS | GENE ID        | FOLD CHANGE      | P VALUE              |
|-------------------------------------------------------------------------------------------------------------------------|----------------------|-------------------------------------|----------------|------------------|----------------------|
| DNA segment, Chr 4, Brigham & Women's<br>Genetics 0951 expressed<br>ectonucleoside triphosphate<br>diphosphohydrolase 8 | D4Bwg0951e<br>Entpd8 | unknown                             | 52829<br>72090 | -4<br>-5.46      | 0.000333<br>0.001689 |
| ELOVL family member 5, elongation of long<br>chain fatty acids (yeast)<br>esterase 1                                    | Elov15<br>Es1        | unknown                             | 68801<br>13884 | -2.68<br>-170.12 | 0.021813<br>0.029798 |
| esterase 31-like                                                                                                        | LOC13909             | unknown                             | 13909          | -13.71           | 0.043801             |
| expressed sequence AI195470                                                                                             | AI195470             | unknown                             | 107131         | -8.85            | 0.027605             |
| expressed sequence AI467657                                                                                             | AI467657             | unknown                             | 102538         | -4.52            | 0.002902             |
| expressed sequence AI852444                                                                                             | AI852444             | unknown                             | 101188         | -4.52            | 0.001962             |
| expressed sequence AV216087                                                                                             | AV216087             | unknown                             | 211896         | -3.98            | 0.00276              |
| expressed sequence AW061290                                                                                             | AW061290             | unknown                             | 381110         | -3.34            | 0.006713             |
| expressed sequence AW111920                                                                                             |                      | unknown                             |                | -4               | 0.014099             |
| expressed sequence AW112010                                                                                             | AW112010             | unknown                             | 107350         | -5.36            | 0.028053             |
| expressed sequence AW112037                                                                                             | AW112037             | unknown                             | 98667          | -2.98            | 0.000435             |
| expressed sequence BB229969                                                                                             |                      | unknown                             |                | -10.22           | 0.011684             |
| expressed sequence BE946605                                                                                             |                      | unknown                             |                | -2.96            | 0.022754             |
| expressed sequence BI647951                                                                                             |                      | unknown                             |                | -2.75            | 0.000711             |
| fetuin beta                                                                                                             | Fetub                | unknown                             | 59083          | -19.37           | 0.00446              |
| fibrinogen-like protein 1                                                                                               | Fgl1                 | unknown                             | 234199         | -2.6             | 0.007985             |
| forkhead-associated (FHA) phosphopeptide<br>binding domain 1                                                            | Fhad1                | unknown                             | 329977         | -4.01            | 0.001629             |
| GLE1 RNA export mediator-like (yeast)                                                                                   | Gle1l                | unknown                             | 74412          | -2.73            | 0.014293             |
| GRAM domain containing 1C                                                                                               | Gramd1c              | unknown                             | 207798         | -3.2             | 0.009814             |
| heat-responsive protein 12                                                                                              | Hrsp12               | unknown                             | 15473          | -5.85            | 0.00564              |
| helicase with zinc finger domain                                                                                        | Helz                 | unknown                             | 78455          | -2.98            | 0.001839             |
| histidine-rich glycoprotein                                                                                             | Hrg                  | unknown                             | 94175          | -2724.57         | 0.003962             |
| hypothetical protein C630010N09                                                                                         | C630010N09           | unknown                             | 330403         | -3.33            | 0.021988             |
| leucine rich repeat containing 8                                                                                        | Lrrc8                | unknown                             | 241296         | -3.36            | 0.00109              |
| leucine zipper transcription regulator 2                                                                                | Lztr2                | unknown                             | 89867          | -10.6            | 0.006058             |
| leucine-rich alpha-2-glycoprotein 1                                                                                     | Lrg1                 | unknown                             | 76905          | -4.46            | 0.003238             |
| LOC434338                                                                                                               |                      | unknown                             | 434338         | -3.17            | 0.028861             |
| mal, T-cell differentiation protein 2                                                                                   | Mal2                 | unknown                             | 105853         | -4.75            | 0.003557             |
| MARVEL (membrane-associating) domain<br>containing 2                                                                    | Marveld2             | unknown                             | 218518         | -2.96            | 0.002399             |
| microrchidia 4                                                                                                          | Morc4                | unknown                             | 75746          | -4.95            | 0.033557             |
| MOCO sulphurase C-terminal domain<br>containing 1                                                                       | Mosc1                | unknown                             | 66112          | -57.09           | 0.007271             |
| NACHT, leucine rich repeat and PYD<br>containing 6                                                                      | Nalp6                | unknown                             | 101613         | -5.38            | 0.00058              |
| NIPA-like domain containing 1                                                                                           | Npal1                | unknown                             | 70701          | -4.96            | 0.001263             |
| nur77 downstream gene 2                                                                                                 | Ndg2                 | unknown                             | 103172         | -2.75            | 0.000082             |
| peroxisomal biogenesis factor 6                                                                                         | Pex6                 | unknown                             | 224824         | -3.11            | 0.003715             |
| phosphatidic acid phosphatase type 2c                                                                                   | Ppap2c               | unknown                             | 50784          | -3.08            | 0.000369             |
| phosphodiesterase 4D interacting protein                                                                                | Pde4dip              | unknown                             | 83679          | -2.52            | 0.002412             |
| pregnancy zone protein                                                                                                  | Pzp                  | unknown                             | 11287          | -4.75            | 0.000029             |

| GENE                                                                                           | GENE SYMBOL                                           | GENE ONTOLOGY BIOLOGICAL<br>PROCESS | GENE ID                       | FOLD CHANGE    | P VALUE            |
|------------------------------------------------------------------------------------------------|-------------------------------------------------------|-------------------------------------|-------------------------------|----------------|--------------------|
| progesterone receptor membrane component<br>receptor accessory protein 6                       | Pgrmc1<br>Reep6                                       | unknown<br>unknown                  | 53328<br>70335                | -2.66<br>-7.56 | 0.0003<br>0.002824 |
| regucalcin                                                                                     | Rgn                                                   | unknown                             | 19733                         | -2.5           | 0.007288           |
| RGM domain family, member C                                                                    | Hfe2                                                  | unknown                             | 69585                         | -142.52        | 0.001977           |
| RIKEN cDNA 0610009A07                                                                          | 0610009A07Rik                                         | unknown                             | 70337                         | -15.49         | 0.00005            |
| RIKEN cDNA 0610011I04 gene                                                                     | 0610011I04Rik                                         | unknown                             | 66058                         | -3.16          | 0.005842           |
| RIKEN cDNA 0610039N19 gene                                                                     | 0610039N19Rik                                         | unknown                             | 67442                         | -3.75          | 0.00425            |
| RIKEN cDNA 1110014J01 gene                                                                     | 1110014J01Rik                                         | unknown                             | 74778                         | -3.2           | 0.001753           |
| RIKEN cDNA 1190003J15 gene                                                                     | 1190003J15Rik                                         | unknown                             | 76974                         | -21.39         | 0.000414           |
| RIKEN cDNA 1200015M12 gene                                                                     | 1200015M12Rik                                         | unknown                             | 71739                         | -4.85          | 0.000133           |
| RIKEN cDNA 1200016E24 gene /// RIKEN<br>cDNA 1200015M12 gene /// RIKEN cDNA<br>1200003I10 gene | 1200016E24Rik///1200<br>015M12Rik///<br>1200003I10Rik | unknown                             | 319202 /// 71719 ///<br>71739 | -2.93          | 0.003282           |
| RIKEN cDNA 1300002K09 gene                                                                     | 1300002K09Rik                                         | unknown                             | 74152                         | -3.47          | 0.001163           |
| RIKEN cDNA 1300011L04 gene                                                                     | 1300011L04Rik                                         | unknown                             | 71763                         | -8.58          | 0.000088           |
| RIKEN cDNA 1300013J15 gene                                                                     | 1300013J15Rik                                         | unknown                             | 67473                         | -3.66          | 0.002803           |
| RIKEN cDNA 1500019G21 gene                                                                     | 1500019G21Rik                                         | unknown                             | 66245                         | -2.53          | 0.004487           |
| RIKEN cDNA 1600014C10 gene                                                                     | 1600014C10Rik                                         | unknown                             | 72244                         | -8.06          | 0.000108           |
| RIKEN cDNA 1810005K13 gene                                                                     | 1810005K13Rik                                         | unknown                             | 66255                         | -5.5           | 0.041545           |
| RIKEN cDNA 1810008I18 gene                                                                     | 1810008I18Rik                                         | unknown                             | 73625                         | -7.34          | 0.015094           |
| RIKEN cDNA 1810010H24 gene                                                                     | 1810010H24Rik                                         | unknown                             | 69066                         | -4.82          | 0.003097           |
| RIKEN cDNA 1810011O10 gene                                                                     | 1810011O10Rik                                         | unknown                             | 69068                         | -7.57          | 0.00315            |
| RIKEN cDNA 1810015C04 gene                                                                     | 1810015C04Rik                                         | unknown                             | 66270                         | -3.26          | 0.000562           |
| RIKEN cDNA 2010003K15 gene                                                                     | 2010003K15Rik                                         | unknown                             | 75606                         | -12.86         | 0.00231            |
| RIKEN cDNA 2210010A19                                                                          | 2210010A19Rik                                         | unknown                             | 94184                         | -3.13          | 0.001141           |
| RIKEN cDNA 2310033P09 gene                                                                     | 2310033P09Rik                                         | unknown                             | 67862                         | -3.39          | 0.000605           |
| RIKEN cDNA 2310076L09 gene                                                                     | 2310076L09Rik                                         | unknown                             | 66968                         | -12.91         | 0.010097           |
| RIKEN cDNA 2510049J12 gene                                                                     | 2510049J12Rik                                         | unknown                             | 70291                         | -3.49          | 0.00179            |
| RIKEN cDNA 2610528J11 gene                                                                     | 2610528J11Rik                                         | unknown                             | 66451                         | -15.24         | 0.014138           |
| RIKEN cDNA 2810459M11 gene                                                                     | 2810459M11Rik                                         | unknown                             | 72792                         | -4.3           | 0.002546           |
| RIKEN cDNA 3930402G23 gene                                                                     | 3930402G23Rik                                         | unknown                             | 74027                         | -2.61          | 0.00473            |
| RIKEN cDNA 4833422F24 gene                                                                     | 4833422F24Rik                                         | unknown                             | 74614                         | -3.34          | 0.023144           |
| RIKEN cDNA 4930506M07 gene                                                                     | 4930506M07Rik                                         | unknown                             | 71653                         | -3.38          | 0.019352           |
| RIKEN cDNA 4931406C07 gene                                                                     | 4931406C07Rik                                         | unknown                             | 70984                         | -3.57          | 0.000141           |
| RIKEN cDNA 4932439K10 gene                                                                     | 4932439K10Rik                                         | unknown                             | 74392                         | -6.9           | 0.012059           |
| RIKEN cDNA 4933429D07 gene                                                                     | 4933429D07Rik                                         | unknown                             | 399624                        | -10.37         | 0.000101           |
| RIKEN cDNA 5730403B10 gene                                                                     | 5730403B10Rik                                         | unknown                             | 66626                         | -4.75          | 0.002861           |
| RIKEN cDNA 5730469M10 gene                                                                     | 5730469M10Rik                                         | unknown                             | 70564                         | -2.71          | 0.009692           |
| RIKEN cDNA 5730472N09 gene                                                                     | 5730472N09Rik                                         | unknown                             | 108958                        | -4             | 0.002882           |
| RIKEN cDNA 6230410P16 gene                                                                     | 6230410P16Rik                                         | unknown                             | 235582                        | -18.58         | 0.000359           |
| RIKEN cDNA 8430408G22 gene                                                                     | 8430408G22Rik                                         | unknown                             | 213393                        | -53.88         | 0.021514           |
| RIKEN cDNA 8430418G19 gene                                                                     | 8430418G19Rik                                         | unknown                             |                               | -10.58         | 0.000064           |
| RIKEN cDNA 8430436F23 gene                                                                     | 8430436F23Rik                                         | unknown                             | 71559                         | -4.03          | 0.011907           |
| RIKEN cDNA 9030611N15 gene                                                                     | 9030611N15Rik                                         | unknown                             | 105387                        | -14.8          | 0.046773           |
| RIKEN cDNA 9030623C06 gene                                                                     | 9030623C06Rik                                         | unknown                             | 66809                         | -2.86          | 0.018736           |
| RIKEN cDNA 9130022K13 gene                                                                     | 9130022K13Rik                                         | unknown                             | 75761                         | -21.21         | 0.004064           |
| RIKEN cDNA 9530008L14 gene                                                                     | 9530008L14Rik                                         | unknown                             | 109254                        | -8.85          | 0.00089            |

| GENE                                                                                | GENE SYMBOL   | GENE ONTOLOGY BIOLOGICAL PROCESS | GENE ID | FOLD CHANGE | P VALUE  |
|-------------------------------------------------------------------------------------|---------------|----------------------------------|---------|-------------|----------|
| RIKEN cDNA A130072N09 gene                                                          | A130072N09Rik | unknown                          | 319271  | -7.45       | 0.006254 |
| RIKEN cDNA A230097K15                                                               | A230097K15Rik | unknown                          | 231510  | -2.87       | 0.045954 |
| RIKEN cDNA A630076J17 gene                                                          | A630076J17Rik | unknown                          | 319929  | -44.89      | 0.002475 |
| RIKEN cDNA C630028N24                                                               | C630028N24Rik | unknown                          | 235386  | -3.21       | 0.006651 |
| RIKEN cDNA C730049O14 gene                                                          | C730049O14Rik | unknown                          | 320117  | -2.9        | 0.007448 |
| RIKEN cDNA D630014A15 gene                                                          | D630014A15Rik | unknown                          | 319666  | -2.83       | 0.00427  |
| ropporin 1-like                                                                     | Ropn11        | unknown                          | 252967  | -3.72       | 0.018453 |
| secreted phosphoprotein 2                                                           | Spp2          | unknown                          | 75396   | -4.09       | 0.0076   |
| selenium binding protein 1                                                          | Selenbp1      | unknown                          | 20341   | -3.09       | 0.03298  |
| selenophosphate synthetase 2                                                        | Sephs2        | unknown                          | 20768   | -3.85       | 0.004798 |
| taxilin beta                                                                        | Txlnb         | unknown                          | 378431  | -3.34       | 0.038045 |
| TBC1 domain family, member 23                                                       | Tbc1d23       | unknown                          | 67581   | -2.67       | 0.00421  |
| transmembrane 4 superfamily member 12                                               | Tspan12       | unknown                          | 269831  | -3.61       | 0.000126 |
| transmembrane protein 30B                                                           | Tmem30b       | unknown                          | 238257  | -51.73      | 0.002795 |
| UDP-N-acetyl-alpha-D-galactosamine:polypeptide N-acetylgalactosaminyltransferase 11 | Galnt11       | unknown                          | 231050  | -2.58       | 0.019243 |
| von Willebrand factor C and EGF domains                                             | Vwce          | unknown                          | 71768   | -12.08      | 0.000377 |
| WD repeat domain 40B                                                                | Wdr40b        | unknown                          | 245404  | -2.58       | 0.004364 |
| weakly similar to RIKEN cDNA 5730493B19 (Mus musculus)                              |               | unknown                          |         | -3.74       | 0.025572 |
| zinc finger, DHHC domain containing 9                                               | Zdhhc9        | unknown                          | 208884  | -3.34       | 0.001578 |

**GENES UPREGULATED  $\geq 2.5$  FOLD ( $p \leq 0.05$ ) in HNF4 $\alpha$  NULL EMBRYONIC LIVERS**

| GENE                                   | GENE SYMBOL   | GENE ONTOLOGY BIOLOGICAL PROCESS | GENE ID | FOLD CHANGE | P VALUE  |
|----------------------------------------|---------------|----------------------------------|---------|-------------|----------|
| amylase 2, pancreatic                  | Amy2          | carbohydrate metabolism          | 11723   | 20.87       | 0.011063 |
| lactate dehydrogenase 2, B chain       | Ldh2          | carbohydrate metabolism          | 16832   | 9.27        | 0.000489 |
| hexokinase 2                           | Hk2           | carbohydrate metabolism          | 15277   | 2.63        | 0.019608 |
| procollagen, type IV, alpha 5          | Col4a5        | cell adhesion                    | 12830   | 2.81        | 0.003176 |
| pleiotrophin                           | Ptn           | cell proliferation               | 19242   | 4.02        | 0.00826  |
| tubulin, beta 6                        | Tubb6         | cytoskeletal organization        | 67951   | 2.54        | 0.00518  |
| neuronatin                             | Nnat          | development                      | 18111   | 38.09       | 0.01651  |
| annexin A13                            | Anxa13        | development                      | 69787   | 3.73        | 0.019489 |
| roundabout homolog 1 (Drosophila)      | Robo1         | development                      | 19876   | 2.86        | 0.027951 |
| angiopoietin-like 6                    | Angptl6       | development                      | 70726   | 2.85        | 0.001405 |
| delta-like 1 homolog (Drosophila)      | Dlk1          | development                      | 13386   | 2.51        | 0.029544 |
| interferon, alpha inducible protein 27 | Ifi27         | immune response                  | 76933   | 3.26        | 0.028314 |
| pancreatic lipase related protein 1    | Pnliprp1      | lipid metabolism                 | 18946   | 4.41        | 0.004753 |
| very low density lipoprotein receptor  | Vldlr         | lipid metabolism                 | 22359   | 3.09        | 0.010095 |
| fucosyltransferase 9                   | Fut9          | protein folding/modification     | 14348   | 4.57        | 0.017847 |
| RIKEN cDNA E430002G05                  | E430002G05Rik | proteolysis                      | 210622  | 3.85        | 0.039976 |
| protease, serine, 23                   | Prss23        | proteolysis                      | 76453   | 3.36        | 0.006548 |



| <b>GENE</b>                                        | <b>GENE SYMBOL</b> | <b>GENE ONTOLOGY BIOLOGICAL<br/>PROCESS</b> | <b>GENE ID</b> | <b>FOLD CHANGE</b> | <b>P VALUE</b> |
|----------------------------------------------------|--------------------|---------------------------------------------|----------------|--------------------|----------------|
| platelet-derived growth factor, C polypeptide      | Pdgfc              | signal transduction                         | 54635          | 3.51               | 0.009533       |
| arginine vasopressin receptor 1A                   | Avpr1a             | signal transduction                         | 54140          | 2.7                | 0.006894       |
| THO complex 1                                      | Thoc1              | signal transduction                         | 225160         | 3.65               | 0.027801       |
| transcription factor 4                             | Tcf4               | transcription                               | 21413          | 311.37             | 0.002505       |
| high mobility group AT-hook 2                      | Hmga2              | transcription                               | 15364          | 4.16               | 0.020603       |
| pre B-cell leukemia transcription factor 3         | Pbx3               | transcription                               | 18516          | 2.74               | 0.001862       |
| serine (or cysteine) proteinase inhibitor, clade A | Serpina6           | transport                                   | 12401          | 30.2               | 0.018743       |
| calcium channel, voltage-dependent, T type, alq    | Cacna1h            | transport                                   | 58226          | 2.63               | 0.036147       |
| RIKEN cDNA 1110032A04 gene                         | 1110032A04Rik      | unknown                                     | 66183          | 126.87             | 0.009429       |
| fidgetin                                           | Fign               | unknown                                     | 60344          | 5.5                | 0.023706       |
| DnaJ (Hsp40) homolog, subfamily C, member 1        | Dnajc12            | unknown                                     | 30045          | 4.95               | 0.01253        |
| RIKEN cDNA 9130213B05 gene                         | 9130213B05Rik      | unknown                                     | 231440         | 4.43               | 0.031931       |
| brain expressed gene 1                             | Bex1               | unknown                                     | 19716          | 2.88               | 0.017552       |
| RNA imprinted and accumulated in nucleus           | Rian               | unknown                                     | 75745          | 2.67               | 0.0069         |
| RIKEN cDNA 2310037P21 gene                         | 2310037P21Rik      | unknown                                     | 72309          | 2.56               | 0.00327        |
| RIKEN cDNA 5033414K04                              | 5033414K04Rik      | unknown                                     | 98496          | 2.56               | 0.013487       |
| RIKEN cDNA 6030405A18                              | 6030405A18Rik      | unknown                                     | 329641         | 2.52               | 0.001739       |
