# Supplementary material
Source: PubMed Central journal article supplement (PMC1482507)

*Cdh1 loxP/+*

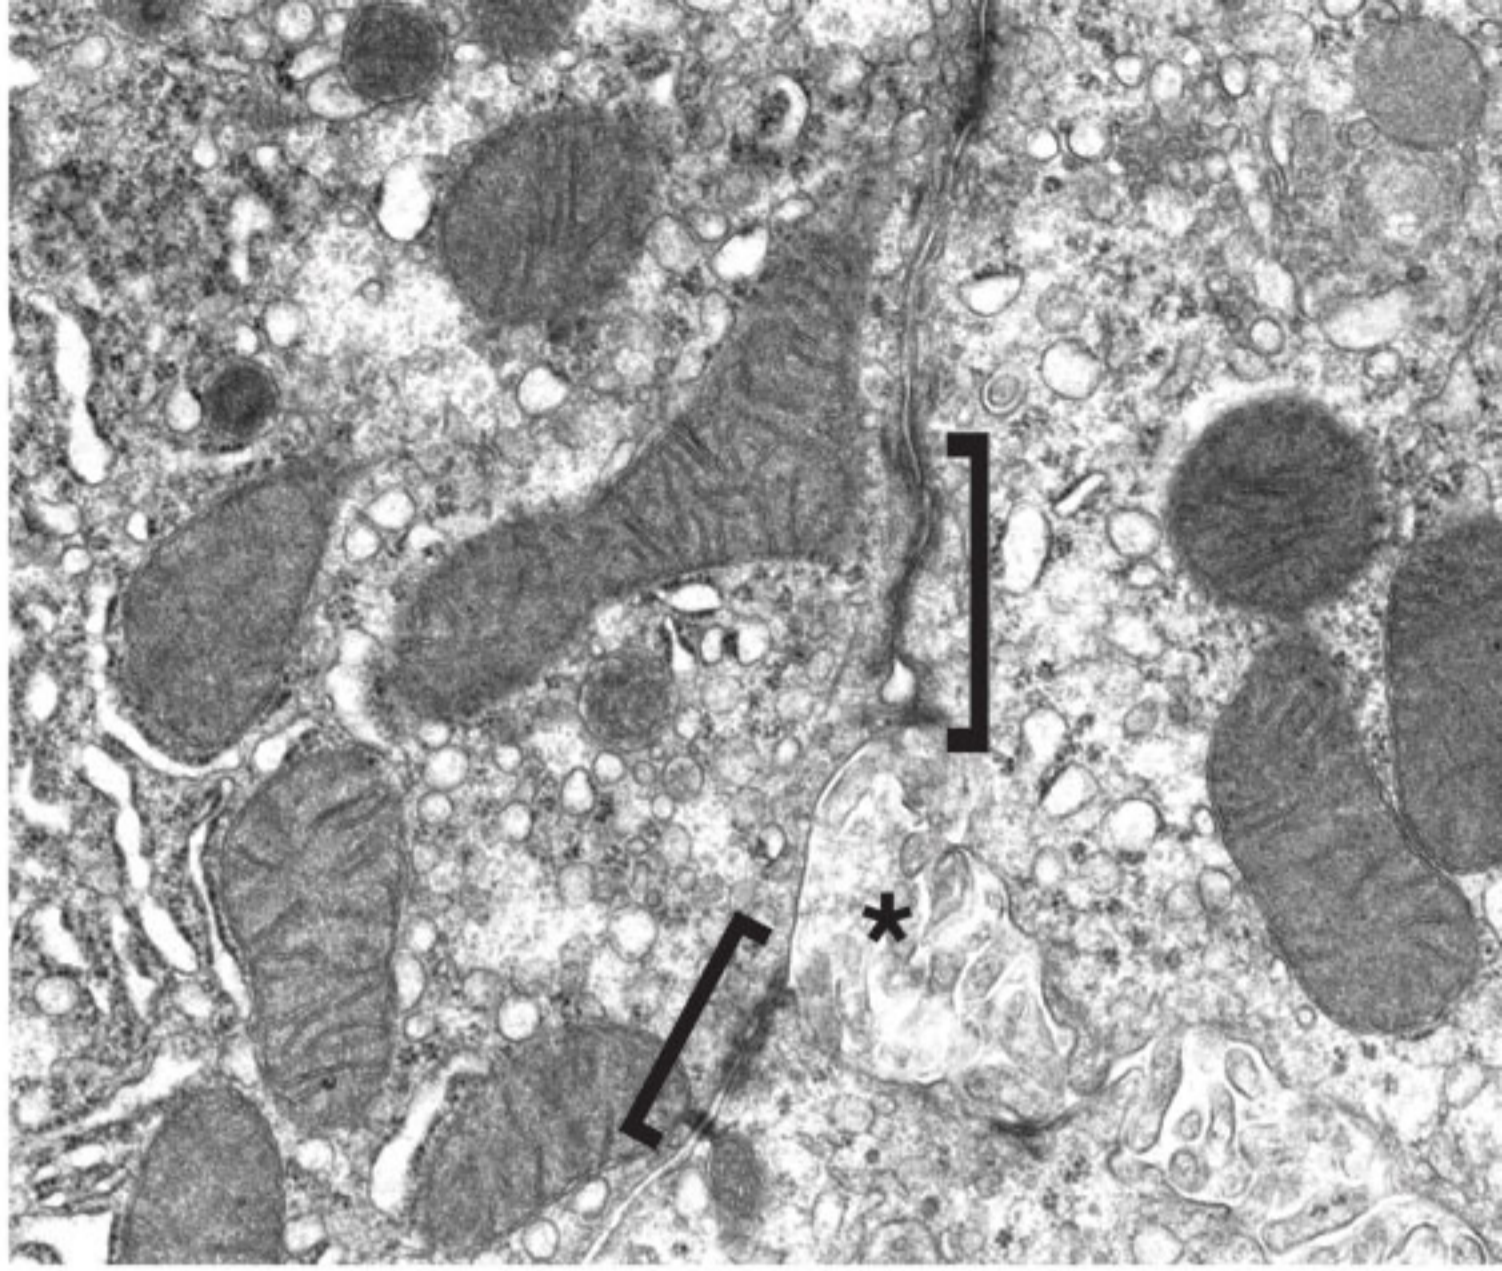

*Cdh1 loxP/loxP*

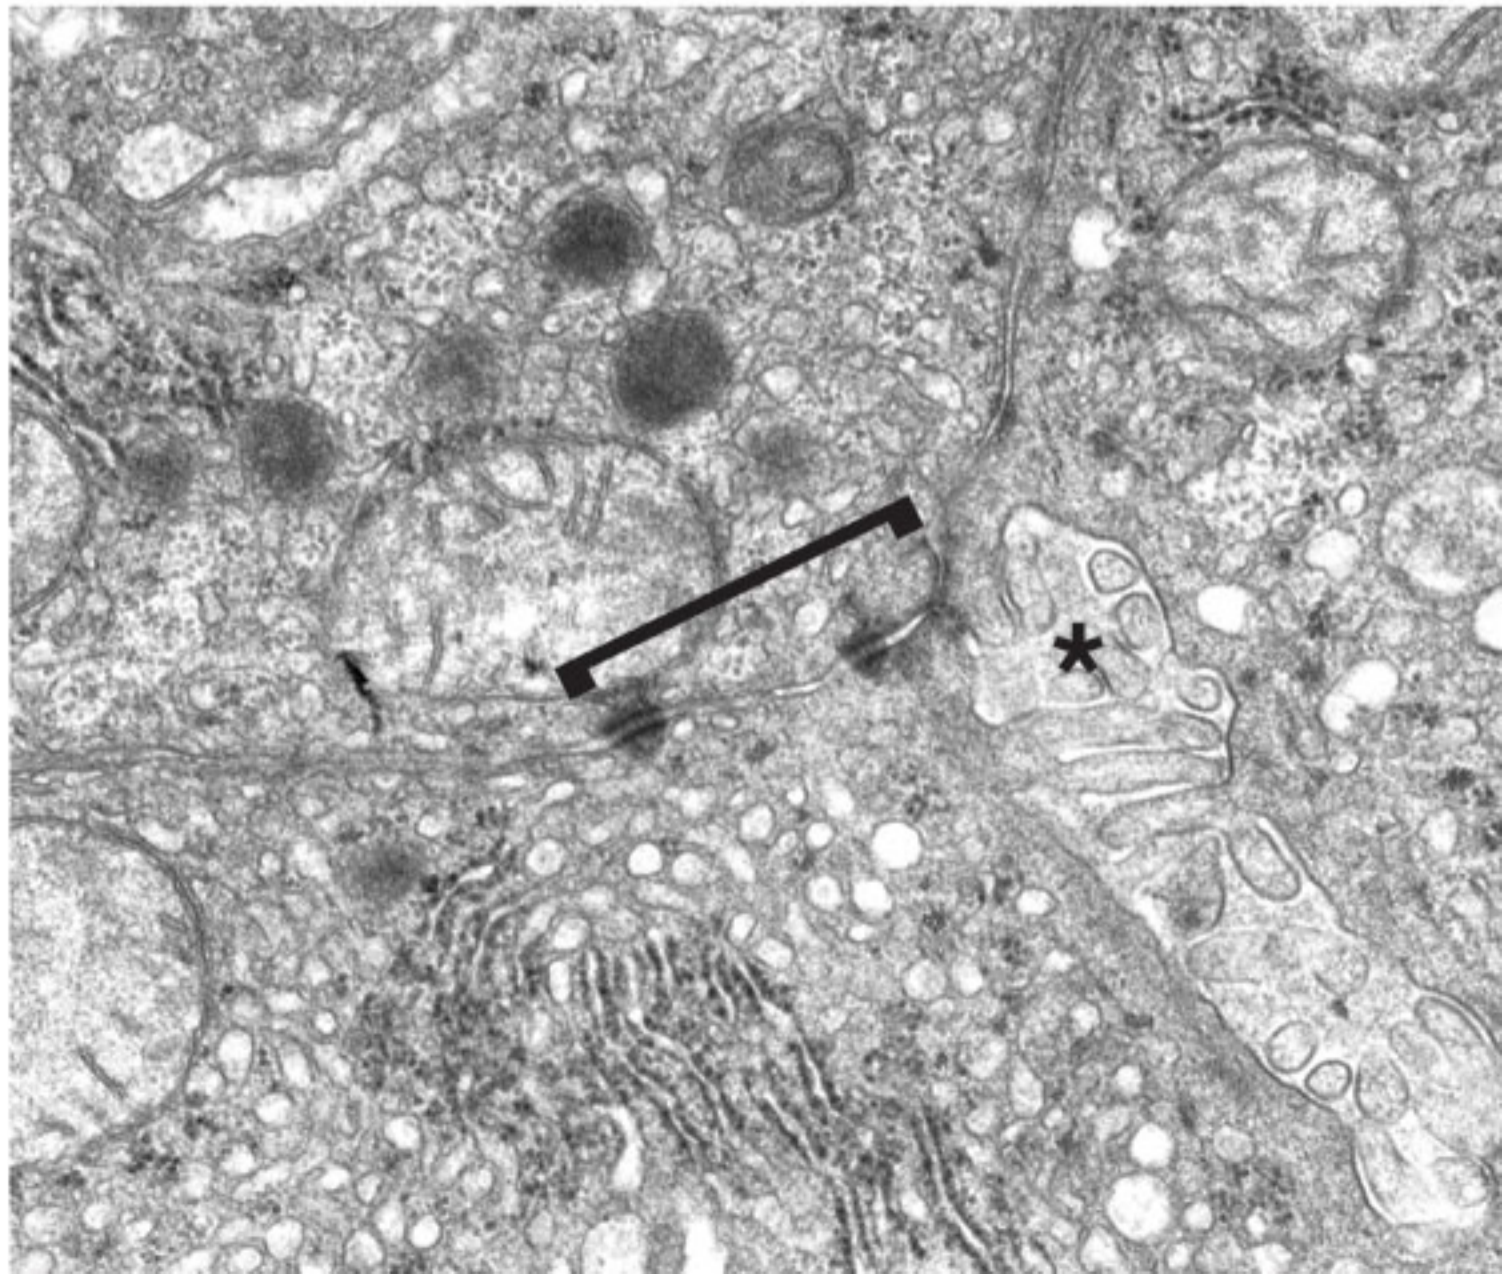

Supplement: pnas_0600246103_1.pdf [file pnas_0600246103_1.pdf]

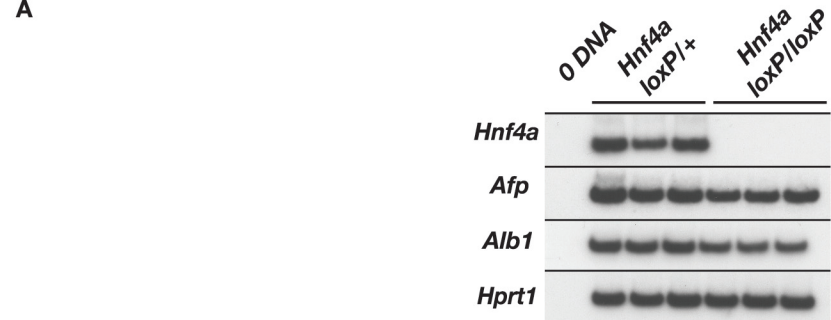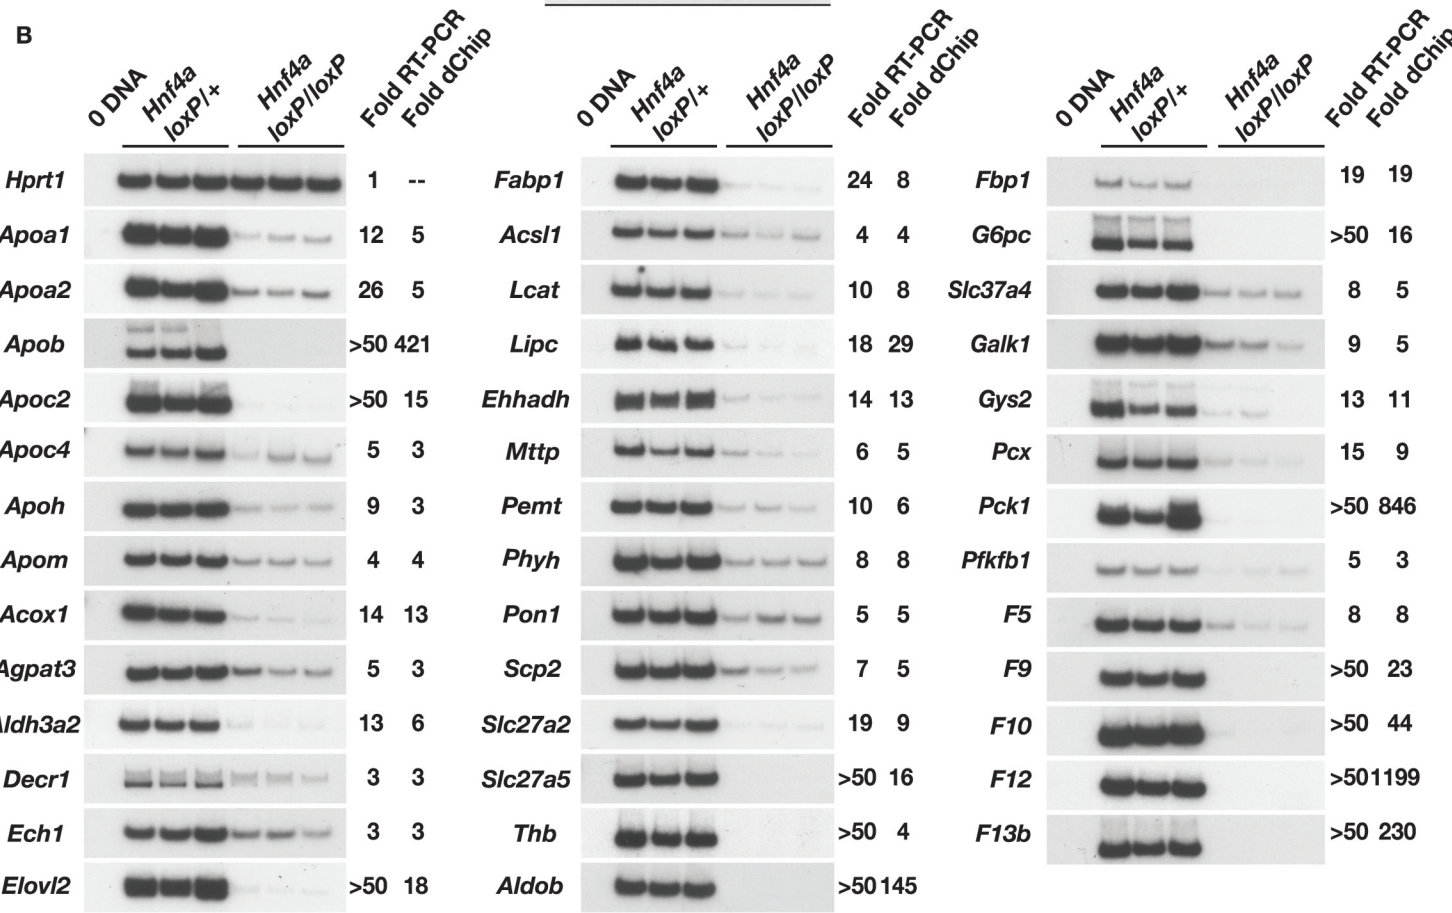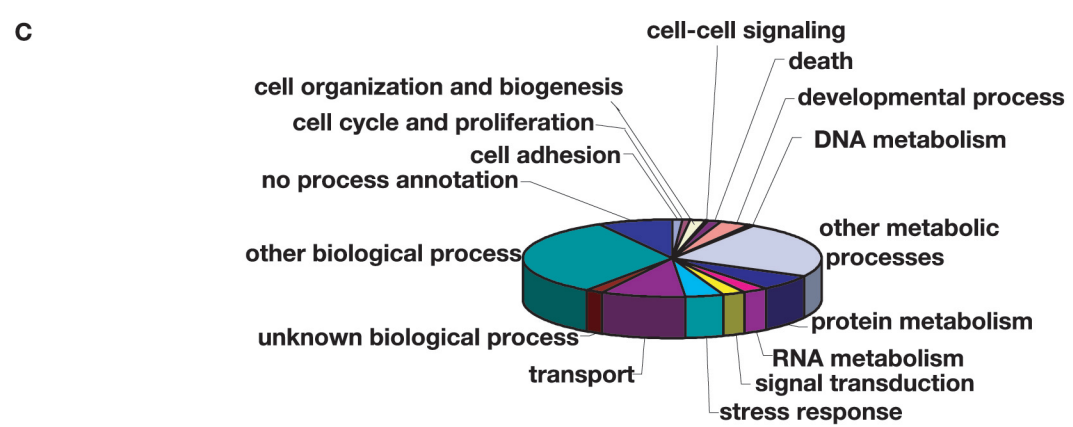

Supplement: pnas_0600246103_2.pdf [file pnas_0600246103_2.pdf]

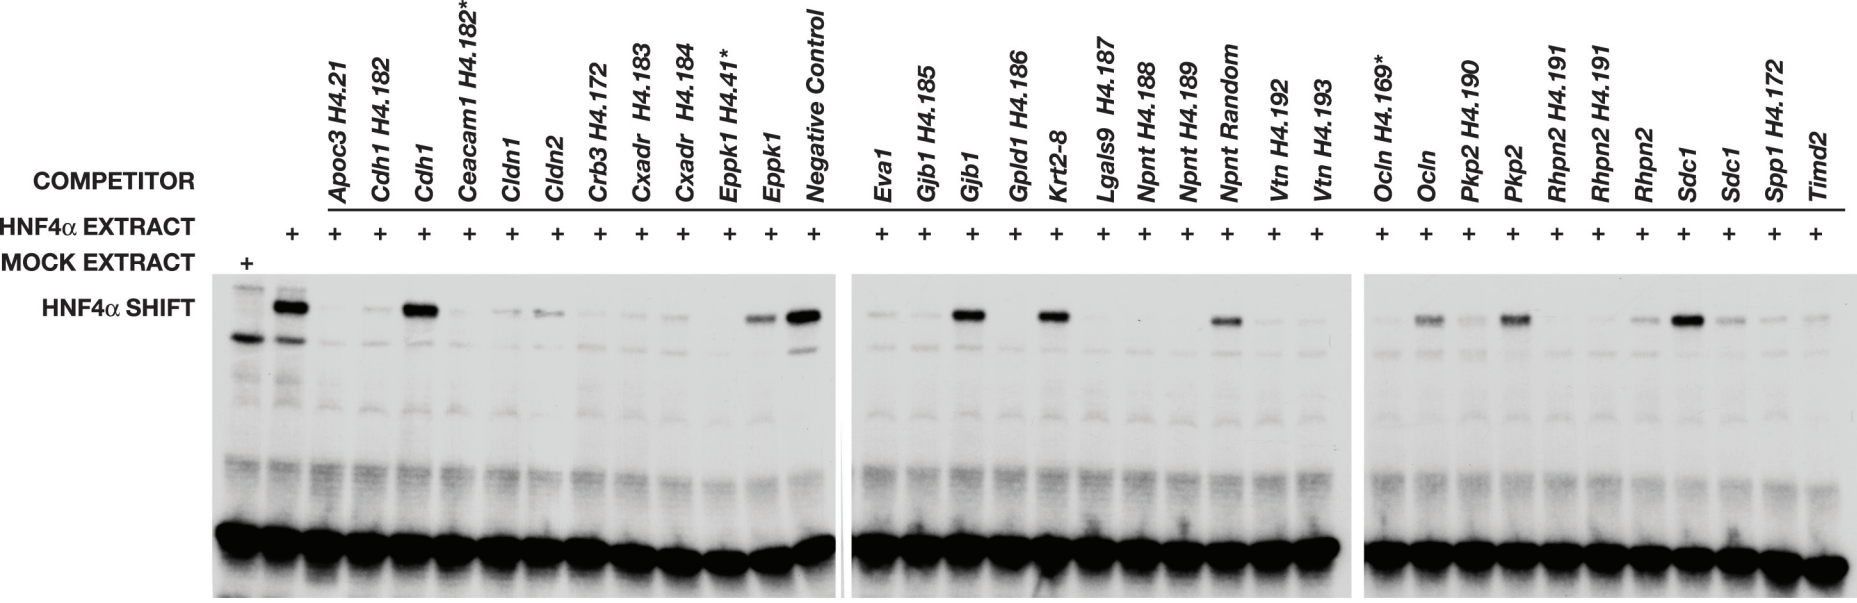

Supplement: pnas_0600246103_3.pdf [file pnas_0600246103_3.pdf]

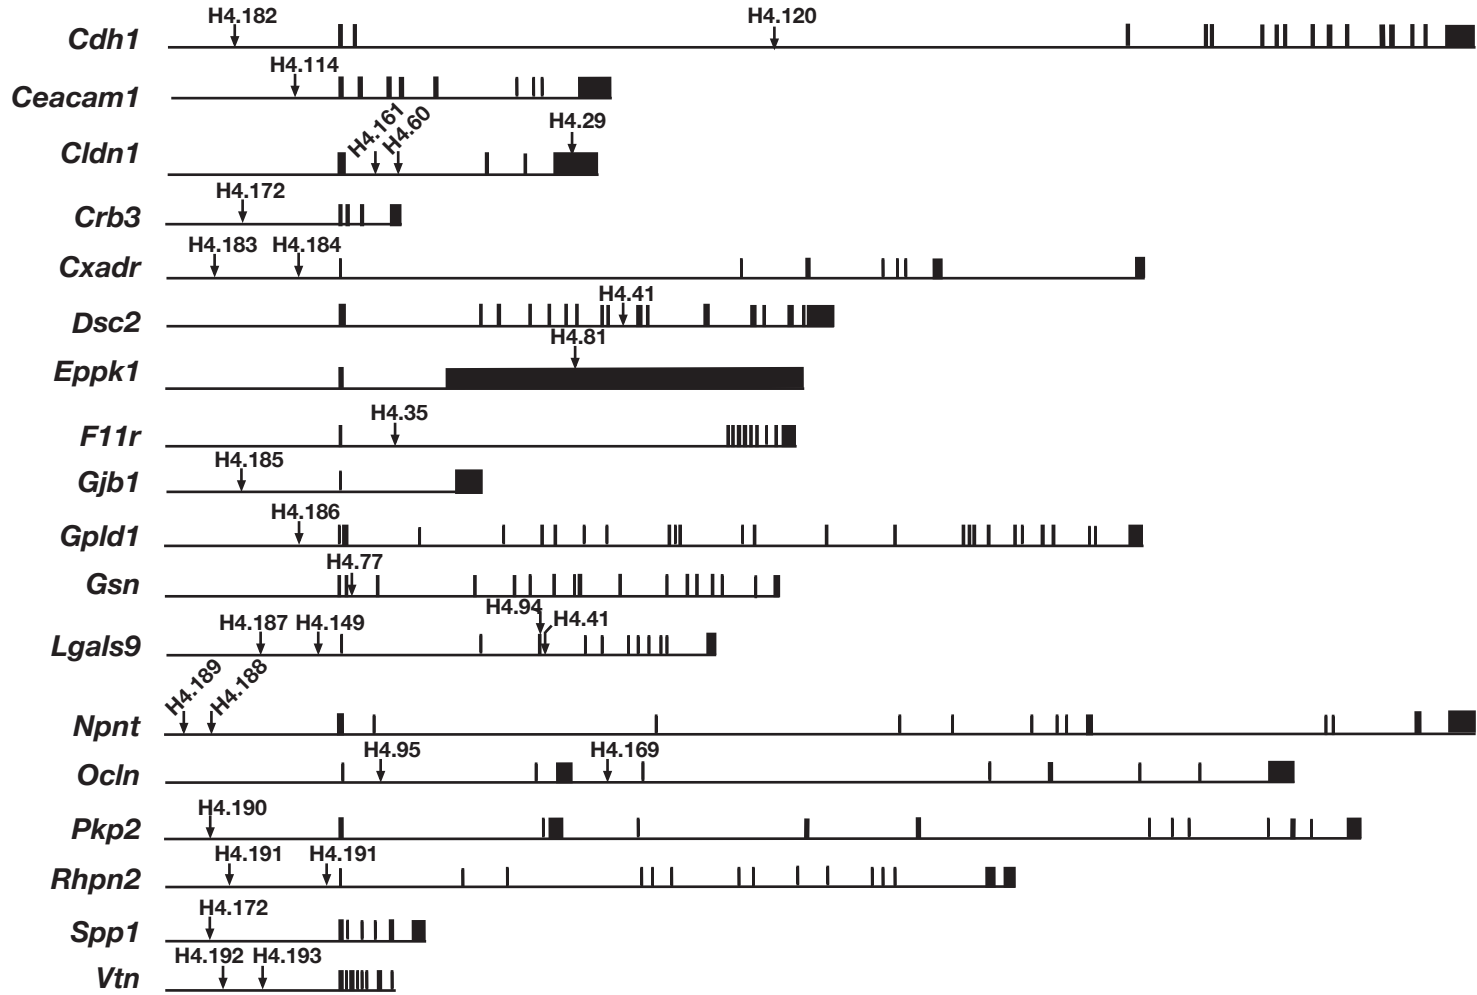

Supplement: pnas_0600246103_4.pdf [file pnas_0600246103_4.pdf]
